# Supplementary material
Source: Royal Society of Chemistry journal article supplement (doi:10.1039/d6ob00095a)

**Supporting Information**

**PCl<sub>3</sub> or PCl<sub>3</sub>/SnCl<sub>4</sub>-Promoted Fluoroalkylthiolation  
of Arenes with Fluoroalkanesulfinyl Chlorides**

*Tian-Cheng Zhong<sup>a</sup>, Min Jiang<sup>b</sup>, and Jin-Tao Liu<sup>a,b\*</sup>*

*<sup>a</sup>The Education Ministry Key Lab of Resource Chemistry and Shanghai Key Laboratory of Rare Earth  
Functional Materials, Shanghai Normal University, Shanghai 200234, China*

*<sup>b</sup>State Key Laboratory of Fluorine and Nitrogen Chemistry and Advanced Materials, Shanghai Institute of  
Organic Chemistry, University of Chinese Academy of Science, Chinese Academy of Science, 345 Lingling Road,  
Shanghai 200032, China.*

*Fax: +86-21-64166128; Tel: +86-21-54925188; E-mail: jtliu@sioc.ac.cn*

Contents:

|                                                                                      |     |
|--------------------------------------------------------------------------------------|-----|
| 1. General Information.....                                                          | S2  |
| 2. Typical procedure for PCl <sub>3</sub> -promoted reaction.....                    | S2  |
| 3. Typical procedure for PCl <sub>3</sub> /SnCl <sub>4</sub> -promoted reaction..... | S2  |
| 4. Compound characterization.....                                                    | S4  |
| 5. References.....                                                                   | S10 |
| 6. Copies of spectra.....                                                            | S11 |

---

## Experimental Section

### General information

Unless otherwise mentioned, solvents and reagents were purchased from commercial sources and used as received. Solvents were freshly distilled by standard procedure prior to use. Melting points were measured on a RY-I apparatus and uncorrected.  $^1\text{H}$  NMR spectra were recorded in  $\text{CDCl}_3$  on a Bruker AM 400 spectrometer (400 MHz) with TMS as internal standard.  $^{19}\text{F}$  NMR spectra were taken on a Bruker AM 400 (376 MHz) spectrometer with  $\text{CFCl}_3$  as external standard.  $^{13}\text{C}$  NMR spectra were recorded in  $\text{CDCl}_3$  on a Varian AM-400 spectrometer (100 MHz) or Agilent AM-400 (100 MHz) spectrometer with TMS as internal standard. For compounds **2k-m**, **2o-q**, the peaks for fluorine-possessing carbon atoms in perfluoroalkyl groups are difficult to find out in  $^{13}\text{C}$  NMR spectra because of their multiplicity. High Resolution Mass Spectra (HRMS) were recorded on Waters Micromass GCT (EI), Thermo Scientific Q Exactive HF Orbitrap-FTMS (ESI), Thermo Fisher Scientific LTQ (DART) or IonSpec FT-ICR mass spectrometer (FI) spectrometers.

### Typical procedure for the $\text{PCl}_3$ -promoted reaction

To a sealed tube containing a solution of **1a** (1.0 mmol, 2.0 equiv) in MeCN (0.2 mL) was slowly added  $\text{PCl}_3$  (0.5 mmol, 1.0 equiv) and  $\text{CF}_3\text{SOCl}$  (0.5 mmol, 1.0 equiv). The mixture was stirred at room temperature for 3 hours. After the completion of reaction, water was added to quench the reaction. The aqueous layer was extracted with ethyl acetate (15 mL  $\times$ 3) and the combined organic layer was dried over anhydrous  $\text{Na}_2\text{SO}_4$ . After removal of solvent under reduced pressure, the residue was purified by column chromatography on silica gel (PE) to give product **2a**.

### Typical procedure for the $\text{PCl}_3/\text{SnCl}_4$ -promoted reaction

---

To a sealed tube containing a solution of **1n** (0.5 mmol, 1.0 equiv) in DCM (0.2 mL) was slowly added SnCl<sub>4</sub> (0.5 mmol, 1.0 equiv), PCl<sub>3</sub> (1.0 mmol, 2.0 equiv) and CF<sub>3</sub>SOCl (1.0 mmol, 2.0 equiv). The mixture was stirred at 100 °C for 3 hours. After the completion of reaction, water was added to quench the reaction. The aqueous layer was extracted with ethyl acetate (15 mL ×3) and the combined organic layer was dried over anhydrous Na<sub>2</sub>SO<sub>4</sub>. After removal of solvent under reduced pressure, the residue was purified by column chromatography on silica gel (PE) to give product **2n**.

---

## Compound characterization

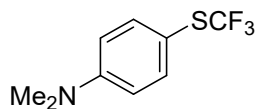

Compound **2a**: Colorless liquid, 85% yield, 93.9 mg. This is a known compound.<sup>[1]</sup> <sup>1</sup>H NMR (400 MHz, CDCl<sub>3</sub>) δ 7.52 (d, *J* = 8.8 Hz, 2H), 6.70 (d, *J* = 8.8 Hz, 2H), 3.02 (s, 6H). <sup>19</sup>F NMR (376 MHz, CDCl<sub>3</sub>) δ -44.67 (s).

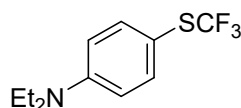

Compound **2b**: Yellow oil, 82% yield, 102.1 mg. <sup>1</sup>H NMR (400 MHz, CDCl<sub>3</sub>) δ 7.45 (d, *J* = 8.8 Hz, 2H), 6.64 (d, *J* = 8.8 Hz, 2H), 3.39 (q, *J* = 7.1 Hz, 4H), 1.20 (t, *J* = 7.1 Hz, 6H). <sup>19</sup>F NMR (376 MHz, CDCl<sub>3</sub>) δ -44.94 (s). <sup>13</sup>C NMR (101 MHz, CDCl<sub>3</sub>) δ 149.48, 138.24, 129.87 (q, *J* = 310.1 Hz), 111.81, 107.11, 44.44, 12.39. MS (FI) *m/z* (%): 249 (100) [M]<sup>+</sup>. HRMS (FI) calcd for C<sub>11</sub>H<sub>14</sub>F<sub>3</sub>NS [M]<sup>+</sup> requires 249.0791, found 249.0794.

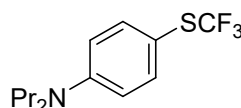

Compound **2c**: Colorless oil, 87% yield, 120.5 mg (*ortho/para* = 1:41). This is a known compound.<sup>[2]</sup> *para*-isomer: <sup>1</sup>H NMR (400 MHz, CDCl<sub>3</sub>) δ 7.44 (d, *J* = 8.9 Hz, 2H), 6.60 (d, *J* = 8.9 Hz, 2H), 3.27 (t, *J* = 8.0 Hz, 2H), 1.68-1.59 (m, 2H), 0.95 (t, *J* = 7.4 Hz, 3H). <sup>19</sup>F NMR (376 MHz, CDCl<sub>3</sub>) δ -44.87 (s).

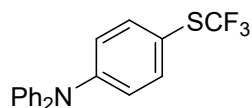

Compound **2d**: Colorless liquid, 57% yield, 98.3 mg. This is a known compound.<sup>[3]</sup> <sup>1</sup>H NMR (400 MHz, CDCl<sub>3</sub>) δ 7.45 (d, *J* = 8.6 Hz, 2H), 7.32 (t, *J* = 7.8 Hz, 4H), 7.17-7.11 (m, 6H), 7.02 (d, *J* = 8.6 Hz, 2H). <sup>19</sup>F NMR (376 MHz, CDCl<sub>3</sub>) δ -43.74 (s).

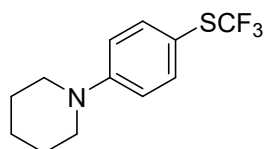

Compound **2e**: Colorless oil, 62% yield, 80.9 mg.  $^1\text{H}$  NMR (400 MHz,  $\text{CDCl}_3$ )  $\delta$  7.48 (d,  $J = 8.7$  Hz, 2H), 6.88 (d,  $J = 8.7$  Hz, 2H), 3.27 (t,  $J = 5.3$  Hz, 4H), 1.72-1.59 (m, 6H).  $^{19}\text{F}$  NMR (376 MHz,  $\text{CDCl}_3$ )  $\delta$  -44.35 (s).  $^{13}\text{C}$  NMR (101 MHz,  $\text{CDCl}_3$ )  $\delta$  153.32, 137.89, 129.79 (q,  $J = 308.4$  Hz), 115.53, 110.61, 49.07, 25.46, 24.26. MS (EI)  $m/z$  (%): 261 (75)  $[\text{M}]^+$ , 260 (32), 192 (100), 136 (30). HRMS (EI) calcd for  $\text{C}_{12}\text{H}_{14}\text{F}_3\text{NS}$   $[\text{M}]^+$  requires 261.0794, found 261.0790.

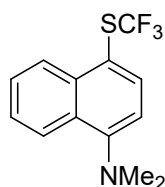

Compound **2f**: Brown oil, 57% yield, 77.3 mg.  $^1\text{H}$  NMR (400 MHz,  $\text{CDCl}_3$ )  $\delta$  8.53 (d,  $J = 8.4$  Hz, 1H), 8.25 (d,  $J = 8.4$  Hz, 1H), 7.87 (d,  $J = 7.9$  Hz, 1H), 7.62 (t,  $J = 6.9$  Hz, 1H), 7.55 (t,  $J = 7.0$  Hz, 1H), 7.03 (d,  $J = 7.9$  Hz, 1H), 2.96 (s, 6H).  $^{19}\text{F}$  NMR (376 MHz,  $\text{CDCl}_3$ )  $\delta$  -43.05 (s).  $^{13}\text{C}$  NMR (101 MHz,  $\text{CDCl}_3$ )  $\delta$  154.76, 138.45, 136.62, 129.77 (q,  $J = 311.1$  Hz), 129.20, 127.29, 126.41, 125.54, 124.98, 114.01, 113.39, 44.85. MS (FI)  $m/z$  (%): 271 (100)  $[\text{M}]^+$ . HRMS (FI) calcd for  $\text{C}_{13}\text{H}_{12}\text{F}_3\text{NS}$   $[\text{M}]^+$  requires 271.0637, found 271.0632.

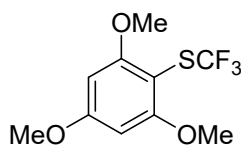

Compound **2g**: Colorless oil, 67% yield, 89.8 mg. This is a known compound.<sup>[4]</sup>  $^1\text{H}$  NMR (400 MHz,  $\text{CDCl}_3$ )  $\delta$  6.15 (s, 2H), 3.86 (s, 6H), 3.84 (s, 3H).  $^{19}\text{F}$  NMR (376 MHz,  $\text{CDCl}_3$ )  $\delta$  -43.56 (s).

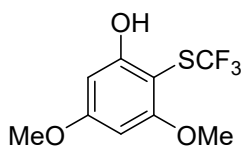

Compound **2h**: Yellow solid, 64% yield, 81.3 mg. This is a known compound.<sup>[5]</sup>  $^1\text{H}$

---

NMR (400 MHz, CDCl<sub>3</sub>) δ 6.62 (s, 1H), 6.24 (s, 1H), 6.09 (s, 1H), 3.85 (s, 3H), 3.81 (s, 3H). <sup>19</sup>F NMR (376 MHz, CDCl<sub>3</sub>) δ -43.75 (s).

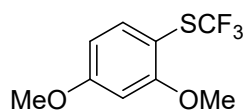

Compound **2i**: Colorless oil, 72% yield, 85.7 mg. This is a known compound.<sup>[4]</sup> <sup>1</sup>H NMR (400 MHz, CDCl<sub>3</sub>) δ 7.53 (d, *J* = 8.4 Hz, 1H), 6.53-6.51 (m, 2H), 3.88 (s, 3H), 3.84 (s, 3H). <sup>19</sup>F NMR (376 MHz, CDCl<sub>3</sub>) δ -43.71 (s).

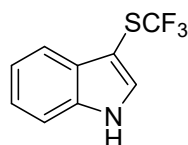

Compound **2j**: Colorless oil, 54% yield, 58.6 mg. This is a known compound.<sup>[6]</sup> <sup>1</sup>H NMR (400 MHz, CDCl<sub>3</sub>) δ 8.46 (s, 1H), 7.86-7.84 (m, 1H), 7.52-7.51 (m, 1H), 7.43-7.41 (m, 1H), 7.35-7.30 (m, 2H). <sup>19</sup>F NMR (376 MHz, CDCl<sub>3</sub>) δ -44.56 (s, 3F).

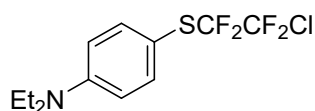

Compound **2k**: Yellow oil, 55% yield, 86.6 mg. <sup>1</sup>H NMR (400 MHz, CDCl<sub>3</sub>) δ 7.42 (d, *J* = 8.9 Hz, 2H), 6.62 (d, *J* = 8.9 Hz, 2H), 3.37 (q, *J* = 7.1 Hz, 4H), 1.18 (t, *J* = 7.1 Hz, 6H). <sup>19</sup>F NMR (376 MHz, CDCl<sub>3</sub>) δ -67.53 (t, *J* = 6.8 Hz, 2F), -88.99 (t, *J* = 6.8 Hz, 2F). <sup>13</sup>C NMR (101 MHz, CDCl<sub>3</sub>) δ 149.55, 138.93, 111.70, 105.63, 44.40, 12.41. MS (FI) *m/z* (%): 315 (100) [M]<sup>+</sup>. HRMS (FI) calcd for C<sub>12</sub>H<sub>14</sub>ClF<sub>4</sub>NS [M]<sup>+</sup> requires 315.0466, found 315.0465.

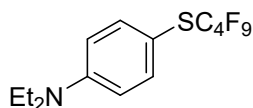

Compound **2l**: Brown oil, 71% yield, 141.7 mg. <sup>1</sup>H NMR (400 MHz, CDCl<sub>3</sub>) δ 7.46 (d, *J* = 8.9 Hz, 2H), 6.66 (d, *J* = 8.9 Hz, 2H), 3.40 (q, *J* = 7.1 Hz, 4H), 1.21 (t, *J* = 7.1 Hz, 6H). <sup>19</sup>F NMR (376 MHz, CDCl<sub>3</sub>) δ -81.16 (t, *J* = 9.8 Hz, 3F), -88.92 (t, *J* = 13.3 Hz, 2F), -120.33~-120.45 (m, 2F), -125.61~-125.72 (m, 2F). <sup>13</sup>C NMR (101 MHz, CDCl<sub>3</sub>)

---

$\delta$  149.66, 139.07, 111.72, 104.62, 44.38, 12.29. MS (FI)  $m/z$  (%): 399 (100)  $[M]^+$ . HRMS (FI) calcd for  $C_{14}H_{14}F_9NS$   $[M]^+$  requires 399.0698, found 399.0695.

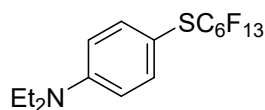

Compound **2m**: Brown oil, 79% yield, 197.1 mg.  $^1H$  NMR (400 MHz,  $CDCl_3$ )  $\delta$  7.45 (d,  $J = 8.9$  Hz, 2H), 6.65 (d,  $J = 8.9$  Hz, 2H), 3.39 (q,  $J = 7.1$  Hz, 4H), 1.20 (t,  $J = 7.1$  Hz, 6H).  $^{19}F$  NMR (376 MHz,  $CDCl_3$ )  $\delta$  -81.05 (t,  $J = 10.0$  Hz, 3F), -88.72 (t,  $J = 13.8$  Hz, 2F), -119.48~-119.60 (m, 2F), -121.54 (s, 2F), -122.92 (s, 2F), -126.22~-126.39 (m, 2F).  $^{13}C$  NMR (101 MHz,  $CDCl_3$ )  $\delta$  149.64, 138.12, 111.70, 104.94, 42.86, 11.39. MS (FI)  $m/z$  (%): 499 (100)  $[M]^+$ . HRMS (FI) calcd for  $C_{16}H_{14}F_{13}NS$   $[M]^+$  requires 499.0634, found 499.0629.

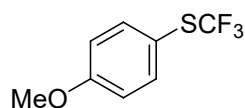

Compound **2n**: Colorless oil, 95% yield, 98.8 mg. This is a known compound.<sup>[4]</sup>  $^1H$  NMR (400 MHz,  $CDCl_3$ )  $\delta$  7.59 (d,  $J = 8.4$  Hz, 2H), 6.94 (d,  $J = 8.4$  Hz, 2H), 3.84 (s, 3H).  $^{19}F$  NMR (376 MHz,  $CDCl_3$ )  $\delta$  -44.01 (s).

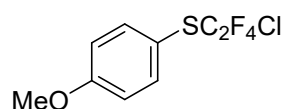

Compound **2o**: Yellow liquid, 66% yield, 90.4 mg.  $^1H$  NMR (400 MHz,  $CDCl_3$ )  $\delta$  7.58 (d,  $J = 8.9$  Hz, 2H), 6.93 (d,  $J = 8.9$  Hz, 2H), 3.84 (s, 3H).  $^{19}F$  NMR (376 MHz,  $CDCl_3$ )  $\delta$  -67.66 (t,  $J = 6.6$  Hz, 2F), -88.26 (t,  $J = 6.6$  Hz, 2F).  $^{13}C$  NMR (101 MHz,  $CDCl_3$ )  $\delta$  161.98, 139.00, 114.94, 113.65 (t,  $J = 2.9$  Hz), 55.36. MS (EI)  $m/z$  (%): 276 (21), 274 (71)  $[M]^+$ , 139 (100), 124 (18), 96 (17). HRMS (EI) calcd for  $C_9H_7ClF_4OS$   $[M]^+$  requires 273.9839, found 273.9836.

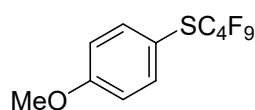

---

Compound **2p**: Colorless liquid, 81% yield, 145.0 mg (*ortho/para* = 1:18). *para*-isomer:  $^1\text{H}$  NMR (400 MHz,  $\text{CDCl}_3$ )  $\delta$  7.55 (d,  $J$  = 8.8 Hz, 2H), 6.92 (d,  $J$  = 8.8 Hz, 2H), 3.82 (s, 3H).  $^{19}\text{F}$  NMR (376 MHz,  $\text{CDCl}_3$ )  $\delta$  -81.02 (t,  $J$  = 9.6 Hz, 3F), -88.13 (t,  $J$  = 15.0 Hz, 2F), -120.18~-120.30 (m, 2F), -125.56~-125.72 (m, 2F).  $^{13}\text{C}$  NMR (101 MHz,  $\text{CDCl}_3$ )  $\delta$  162.04, 139.13, 114.98, 112.98, 55.41. MS (EI)  $m/z$  (%): 358 (49)  $[\text{M}]^+$ , 139 (100), 124 (15), 96 (12). HRMS (EI) calcd for  $\text{C}_{11}\text{H}_7\text{F}_9\text{OS}$   $[\text{M}]^+$  requires 358.0068, found 358.0071.

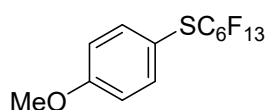

Compound **2q**: Colorless oil, 92% yield, 210.7 mg (*ortho/para* = 1:36). *para*-isomer:  $^1\text{H}$  NMR (400 MHz,  $\text{CDCl}_3$ )  $\delta$  7.57 (d,  $J$  = 8.7 Hz, 2H), 6.93 (d,  $J$  = 8.7 Hz, 2H), 3.84 (s, 3H).  $^{19}\text{F}$  NMR (376 MHz,  $\text{CDCl}_3$ )  $\delta$  -80.89 (t,  $J$  = 10.1 Hz, 3F), -87.93 (t,  $J$  = 13.6 Hz, 2F), -119.34~-119.46 (m, 2F), -121.56 (s, 2F), -122.91 (s, 2F), -126.18~-126.36 (m, 2F).  $^{13}\text{C}$  NMR (101 MHz,  $\text{CDCl}_3$ )  $\delta$  162.04, 139.13, 114.97, 113.03, 55.38. MS (EI)  $m/z$  (%): 458 (95)  $[\text{M}]^+$ , 439 (30), 139 (100), 124 (34), 96 (32). HRMS (EI) calcd for  $\text{C}_{13}\text{H}_7\text{F}_{13}\text{OS}$   $[\text{M}]^+$  requires 458.0005, found 458.0009.

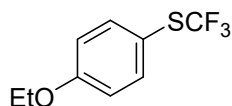

Compound **2r**: Colorless liquid, 95% yield, 105.5 mg (*ortho/para* = 1:27). This is a known compound. <sup>[7]</sup> *para*-isomer:  $^1\text{H}$  NMR (400 MHz,  $\text{CDCl}_3$ )  $\delta$  7.55 (d,  $J$  = 8.8 Hz, 2H), 6.90 (d,  $J$  = 8.8 Hz, 2H), 4.04 (q,  $J$  = 7.0 Hz, 2H), 1.42 (t,  $J$  = 7.0 Hz, 3H).  $^{19}\text{F}$  NMR (376 MHz,  $\text{CDCl}_3$ )  $\delta$  -44.03 (s).

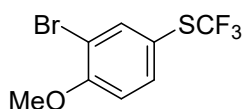

Compound **2s**: Yellow liquid, 43% yield, 51.2 mg (*ortho/para* = 1:33). This is a known compound. <sup>[4]</sup> *para*-isomer:  $^1\text{H}$  NMR (400 MHz,  $\text{CDCl}_3$ )  $\delta$  7.23 (d,  $J$  = 8.4 Hz, 1H), 7.10 (s, 1H), 6.86 (d,  $J$  = 8.4 Hz, 1H), 3.89 (s, 3H), 3.88 (s, 3H).  $^{19}\text{F}$  NMR (376 MHz,  $\text{CDCl}_3$ )  $\delta$  -43.76 (s).

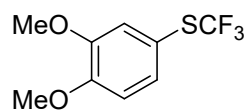

Compound **2t**: Colorless oil, 64% yield, 91.5 mg. This is a known compound. <sup>[4]</sup> <sup>1</sup>H NMR (400 MHz, CDCl<sub>3</sub>) δ 7.84 (d, *J* = 2.2 Hz, 1H), 7.58 (dd, *J* = 8.6, 2.3 Hz, 1H), 6.92 (d, *J* = 8.6 Hz, 1H), 3.94 (s, 3H). <sup>19</sup>F NMR (376 MHz, CDCl<sub>3</sub>) δ -43.98 (s).

---

## References

- [1] C. Xu, B. Ma, Q. Shen, *N*-Trifluoromethylthiosaccharin: An Easily Accessible, Shelf-Stable, Broadly Applicable Trifluoromethylthiolating Reagent, *Angew. Chem., Int. Ed.* **2014**, *53*, 9316-9320.
- [2] C. Li, M.-T. Ge, L. Bai, A.-B. Xia, D.-Q. Xu, Z.-Y. Xu, Direct N-alkylation of sulfur-containing amines, *Org. Biomol. Chem.* **2021**, *19*, 4478-4482.
- [3] G. Teverovskiy, D. S. Surry, S. L. Buchwald, C-S Bond Formation, *Angew. Chem., Int. Ed.* **2011**, *50*, 7312-7314.
- [4] D. Wang, C. G. Carlton, M. Tayu, J. J. W. McDouall, G. J. P. Perry, D. J. Procter, Trifluoromethyl Sulfoxides: Reagents for Metal-Free C-H Trifluoromethylthiolation, *Angew. Chem., Int. Ed.* **2020**, *59*, 15918-15922.
- [5] L. Jiang, W. Yi, Q. Liu, Direct Phosphorus-Induced Fluoroalkylthiolation with Fluoroalkylsulfonyl Chlorides, *Adv. Synth. Catal.* **2016**, *358*, 3700-3705.
- [6] L. Jiang, Q. Yan, R. Wang, T. Ding, W. Yi, W. Zhang, Trifluoromethanesulfinyl Chloride for Electrophilic Trifluoromethylthiolation and Bifunctional Chlorotrifluoromethylthiolation, *Chem. Eur. J.* **2018**, *24*, 18749-18756.
- [7] K. Kang, C. Xu, Q. Shen, Copper-catalyzed trifluoromethylthiolation of aryl and vinyl boronic acids with a shelf-stable electrophilic trifluoromethylthiolating reagent, *Org. Chem. Front.* **2014**, *1*, 294-297.

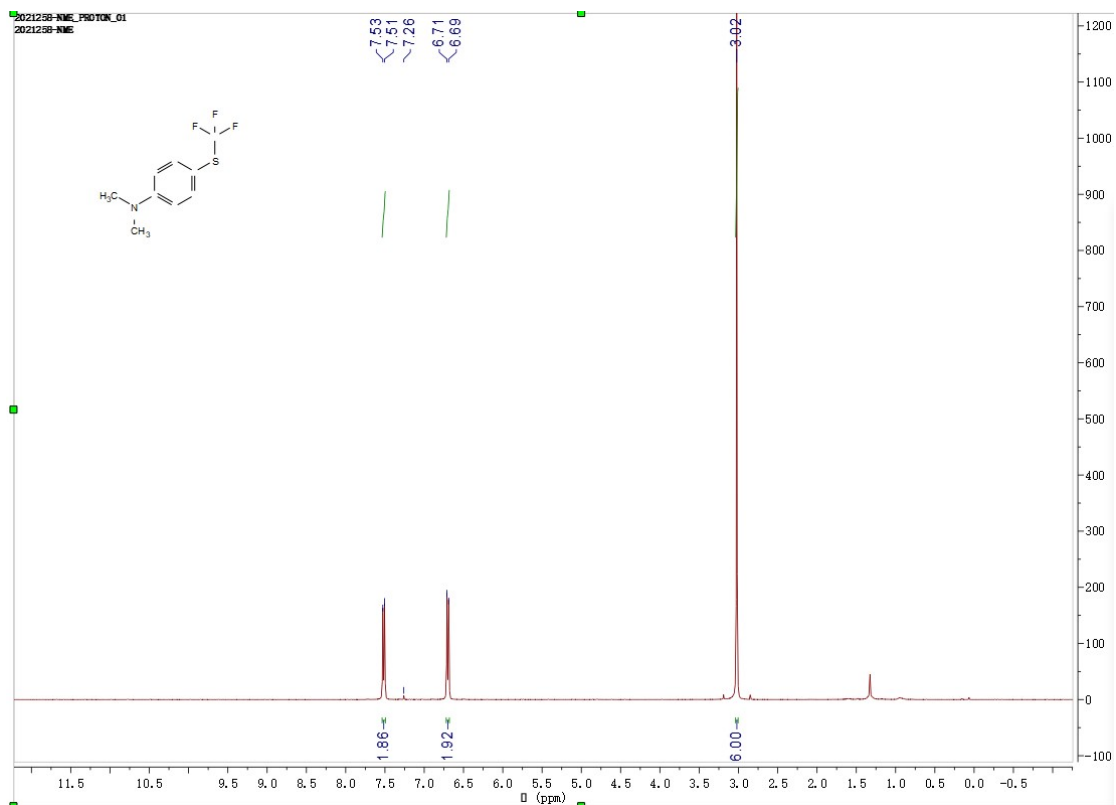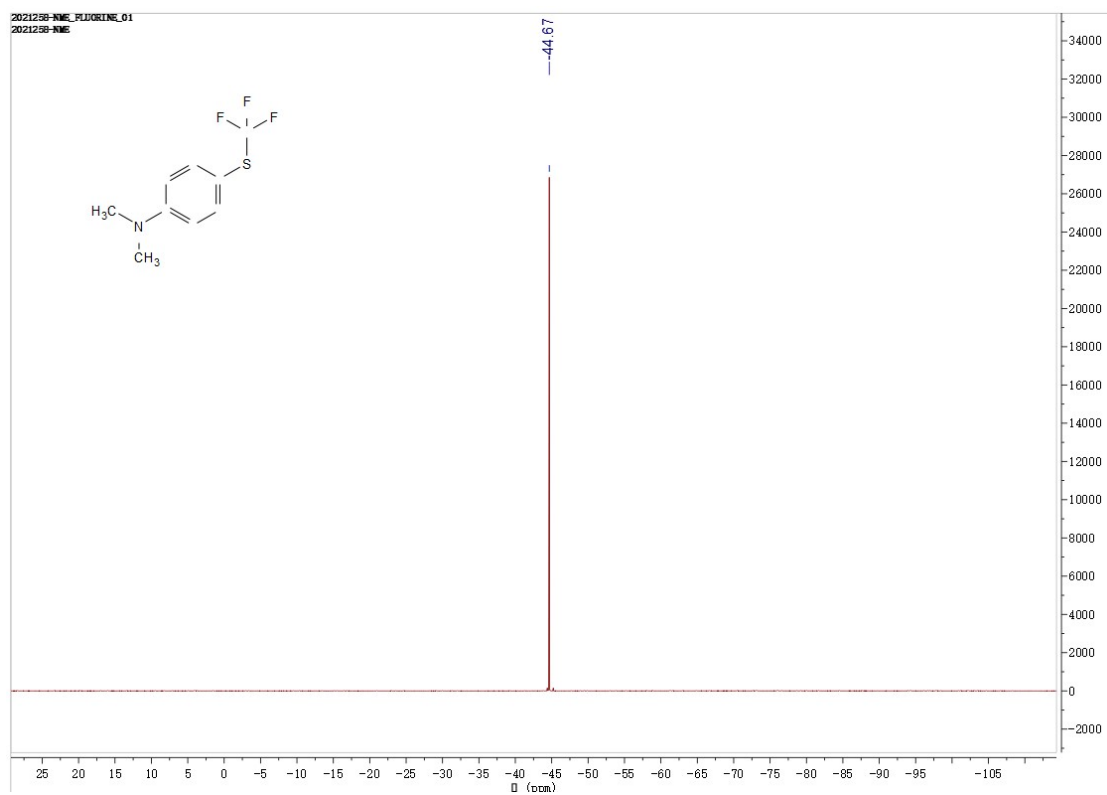

2021288-11-2-h  
STANDARD 1H OBSERVE - profile

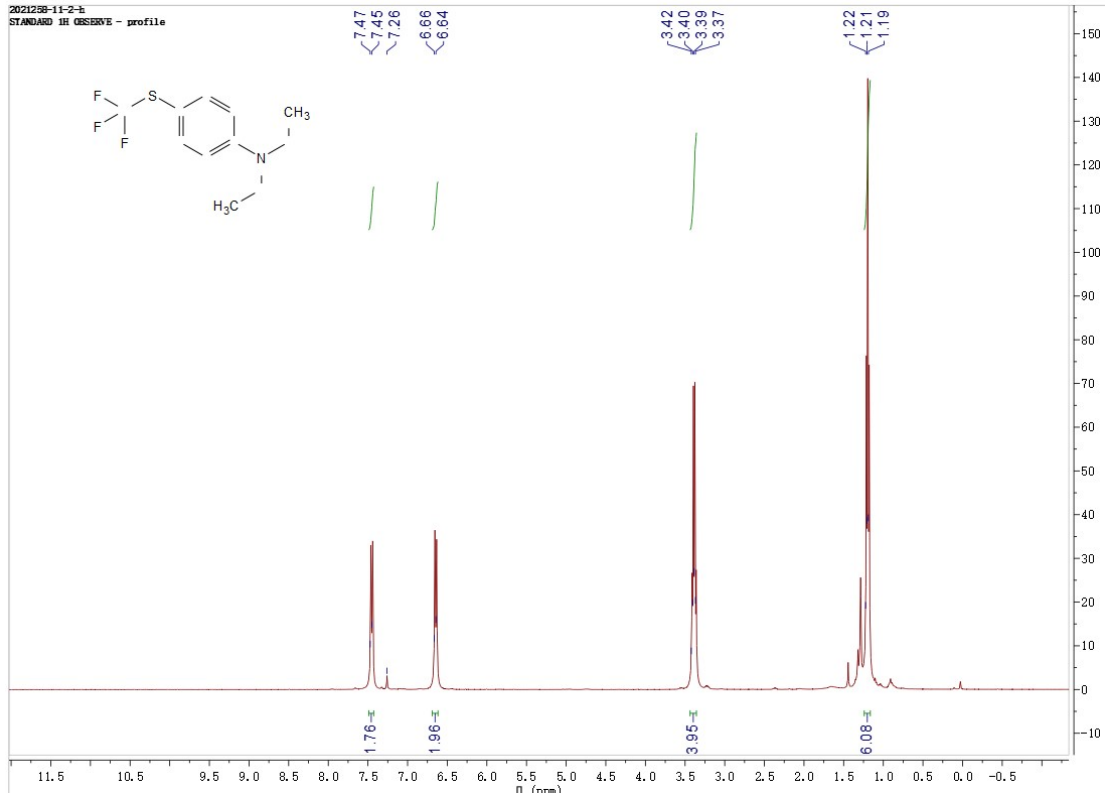

2021288-11-2-f  
STANDARD FLUORINE PARAMETERS

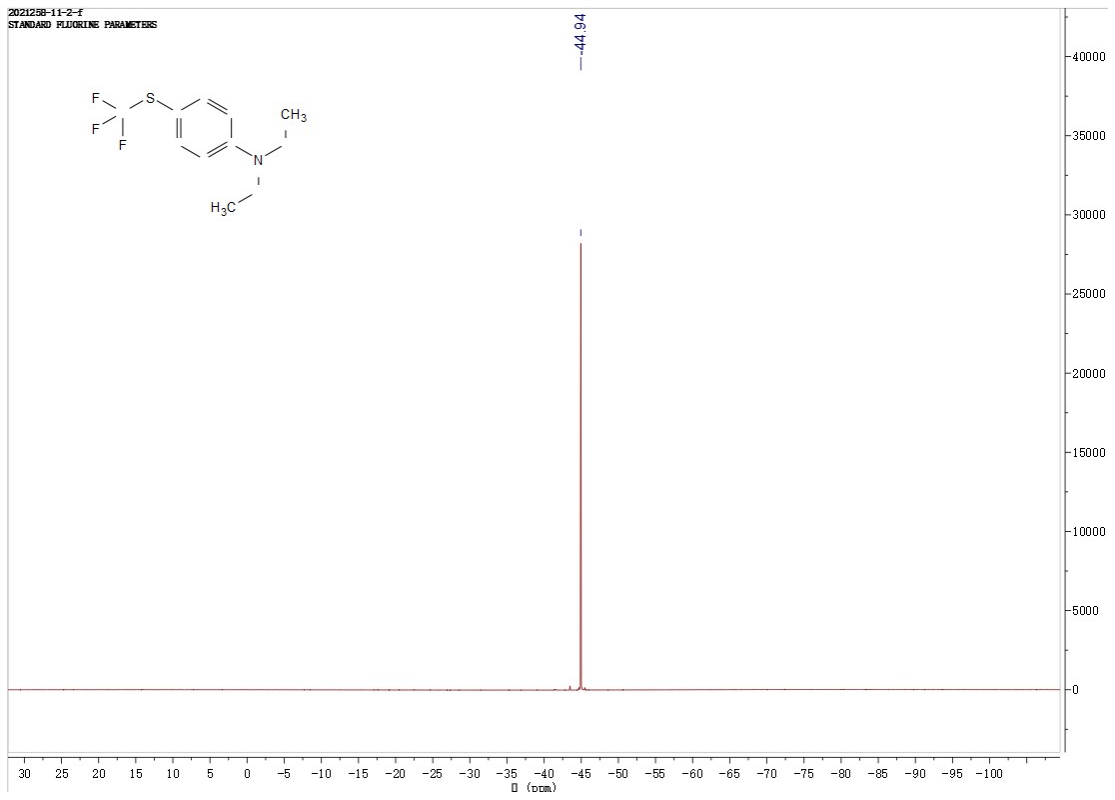

2021298-15-0\_1f-3\_1.fid

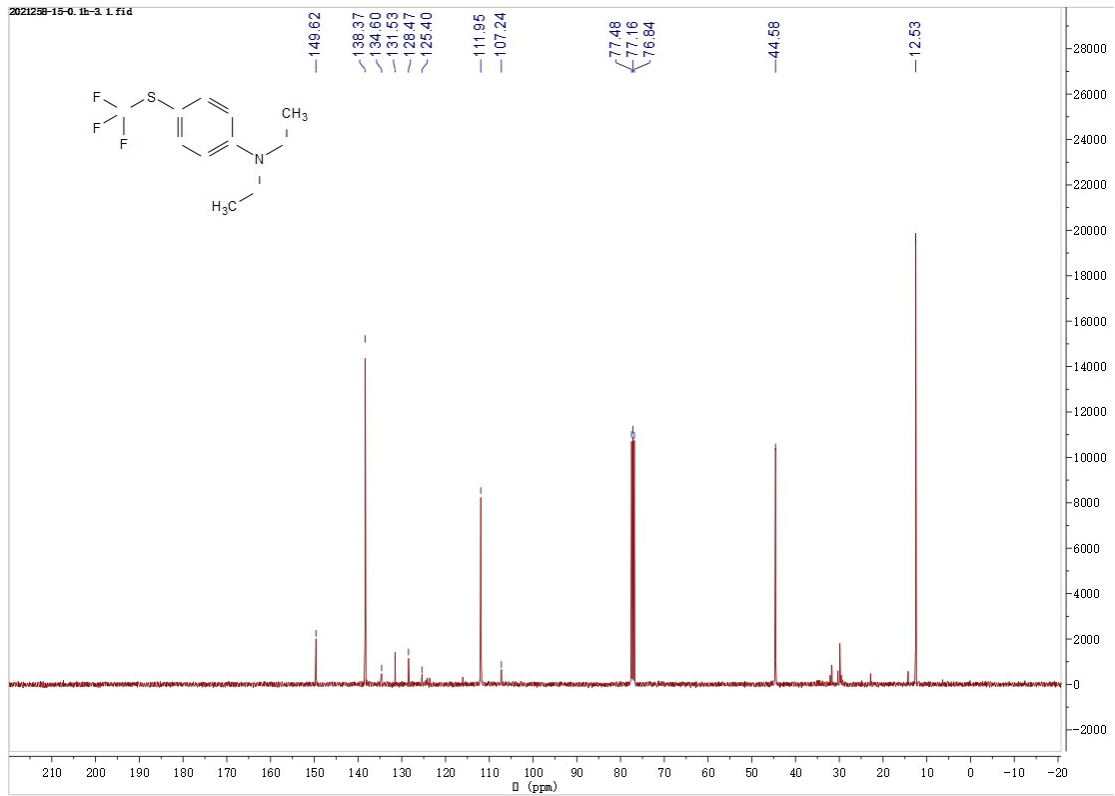

2021258-28-2\_PROTON\_01  
2021258-28-2

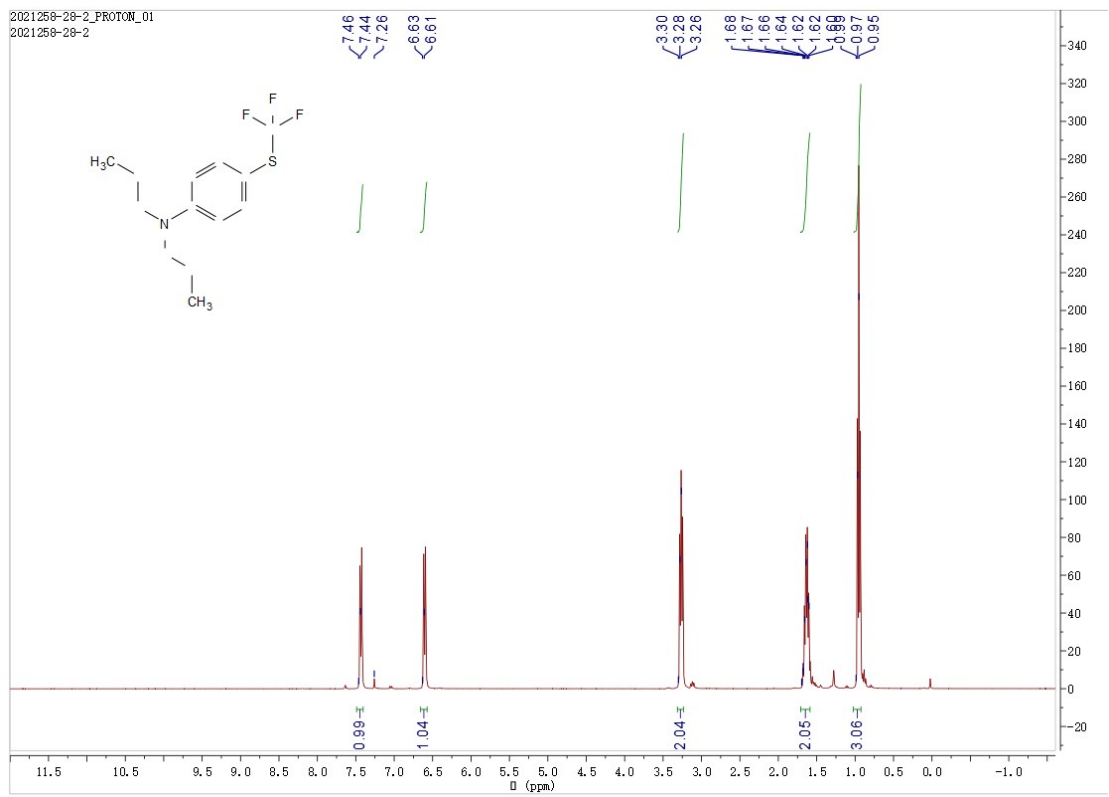

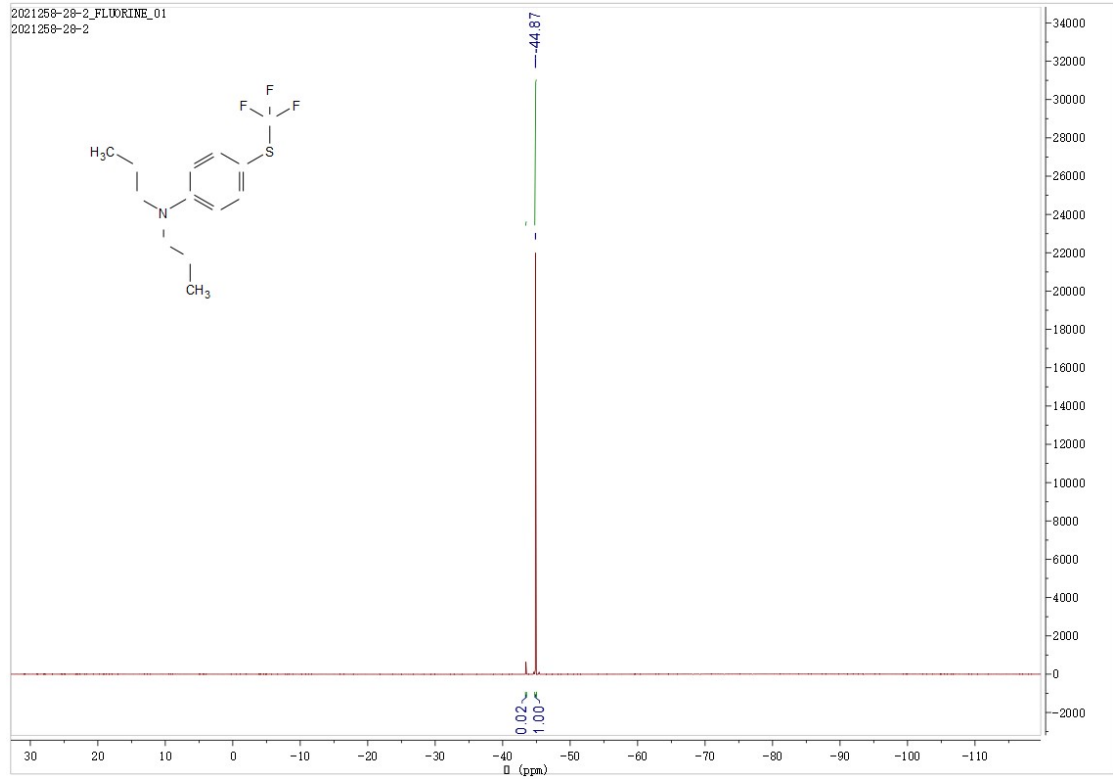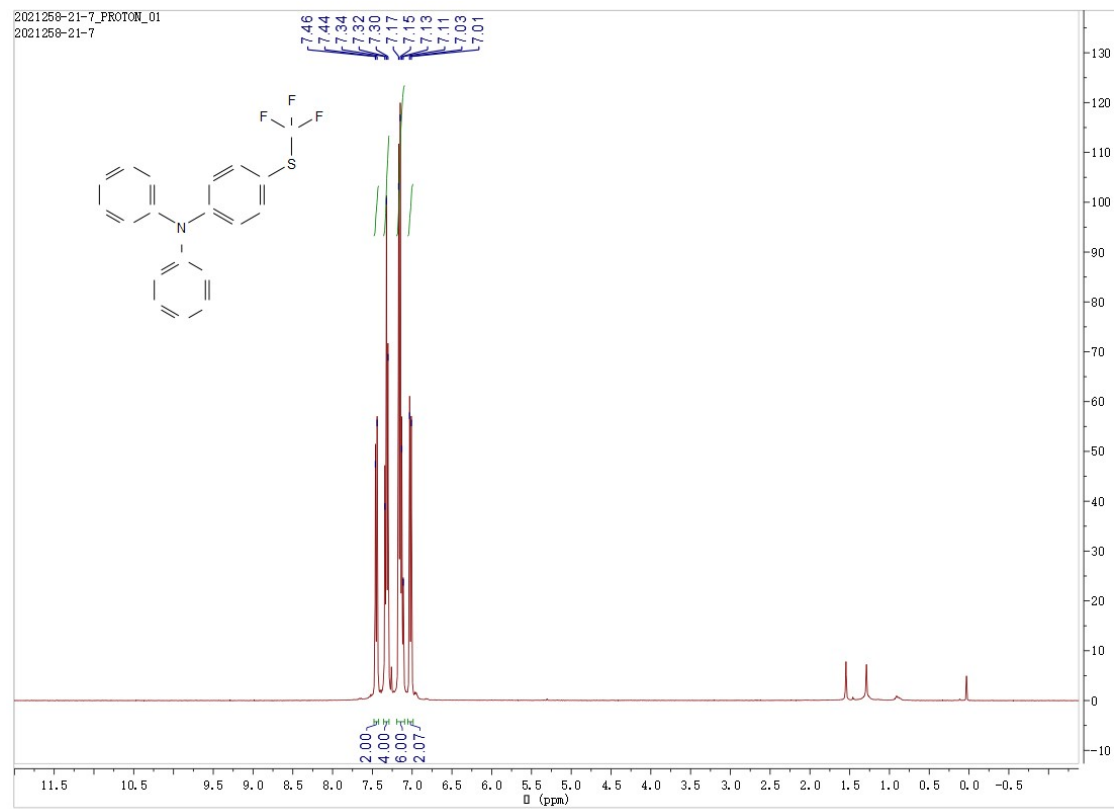

2021258-21-7\_FLUORINE\_01  
2021258-21-7

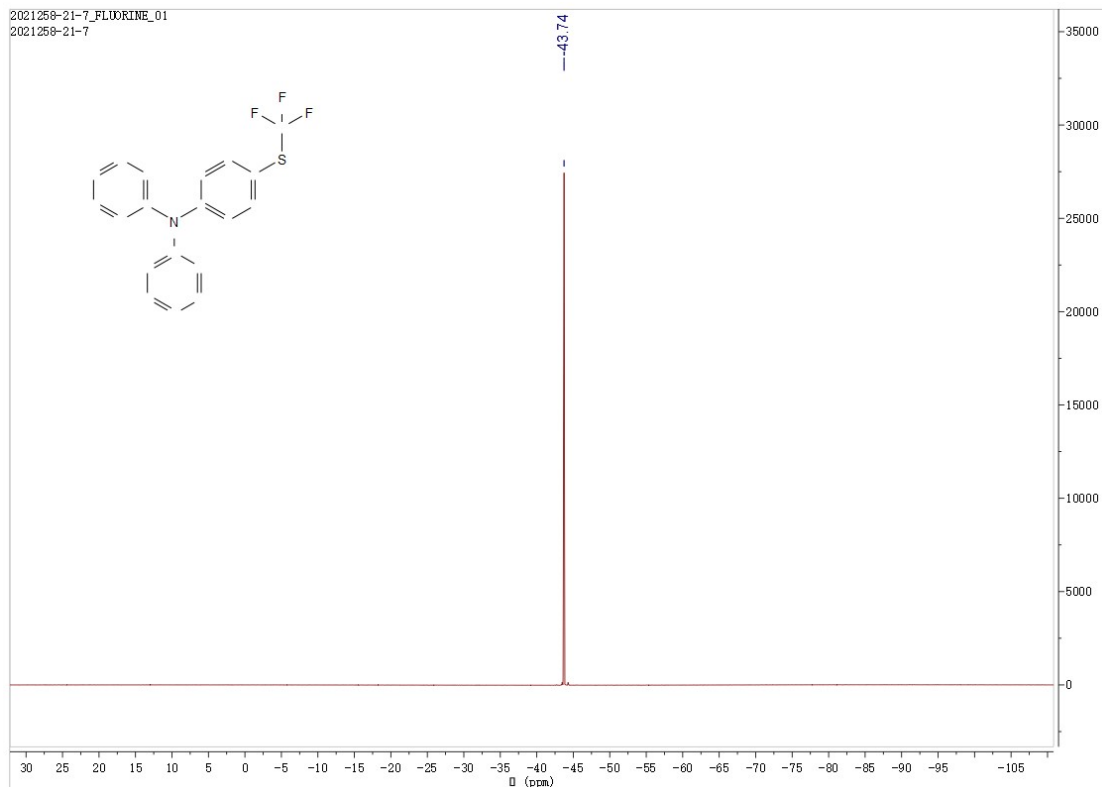

2021258-17-1\_PROTON\_01  
2021258-17-1

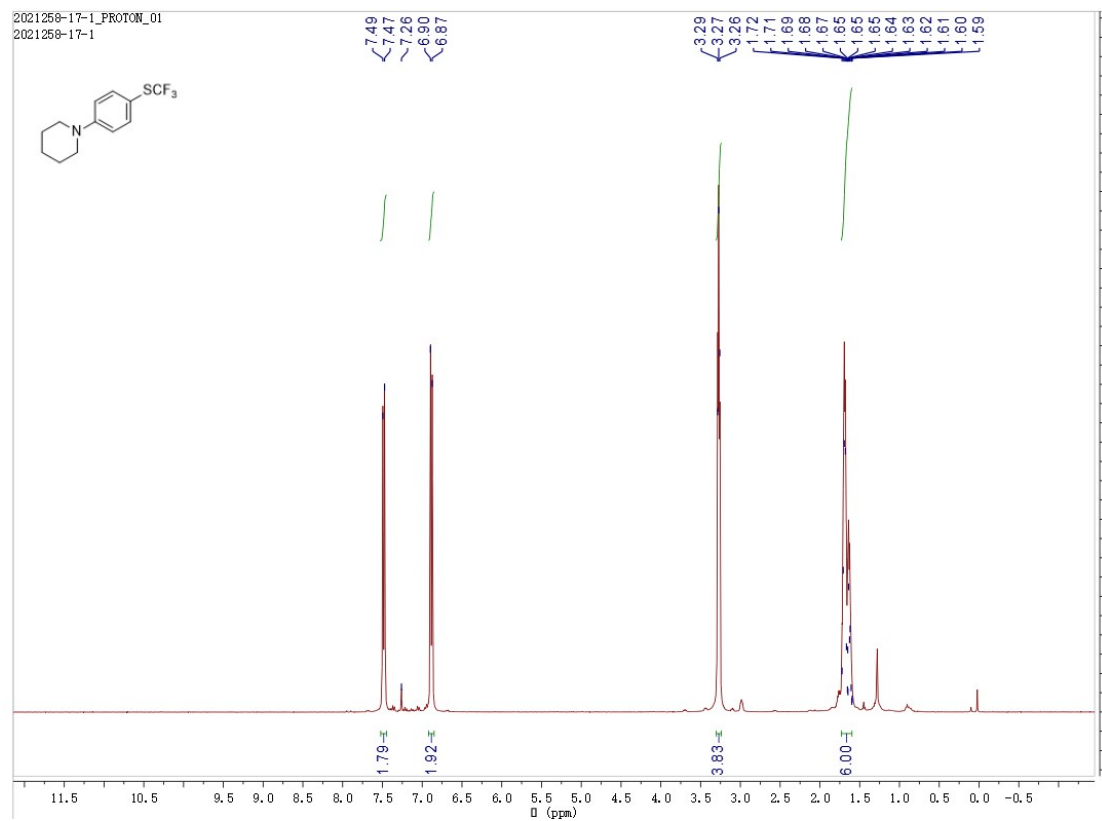

2021258-17-1\_FLUORINE\_01  
2021258-17-1

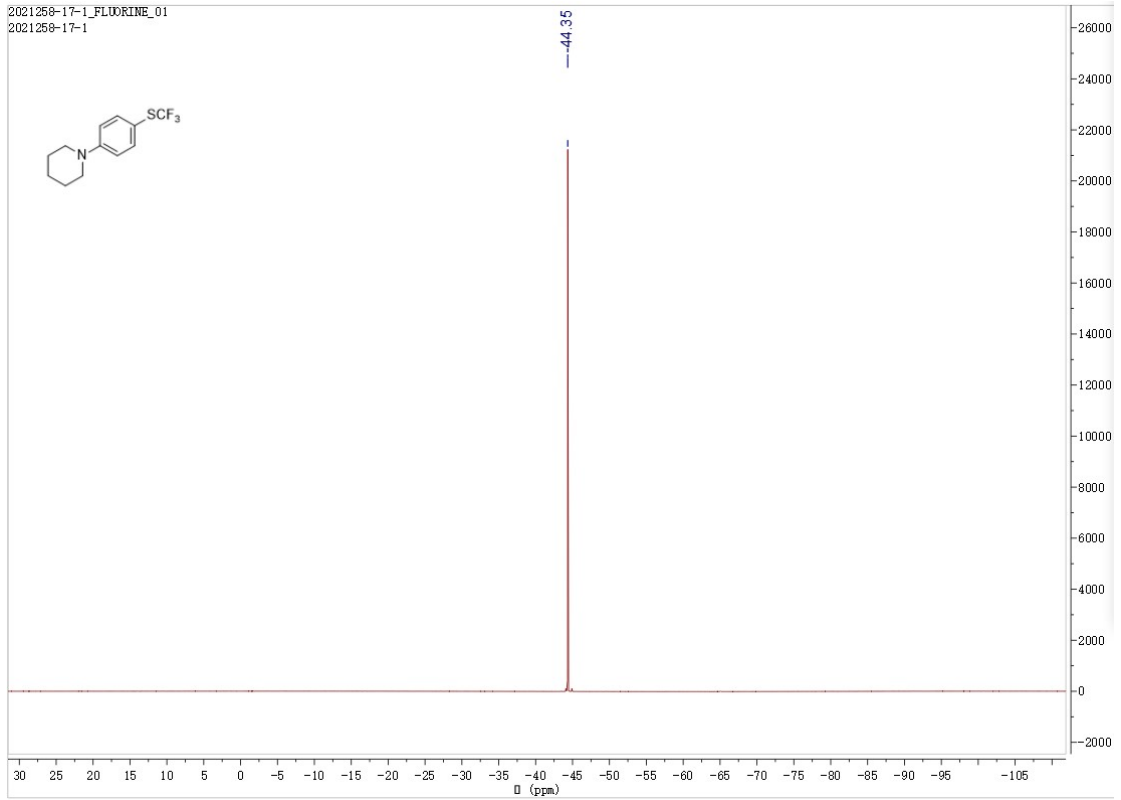

2021258-17-1.1.Fid

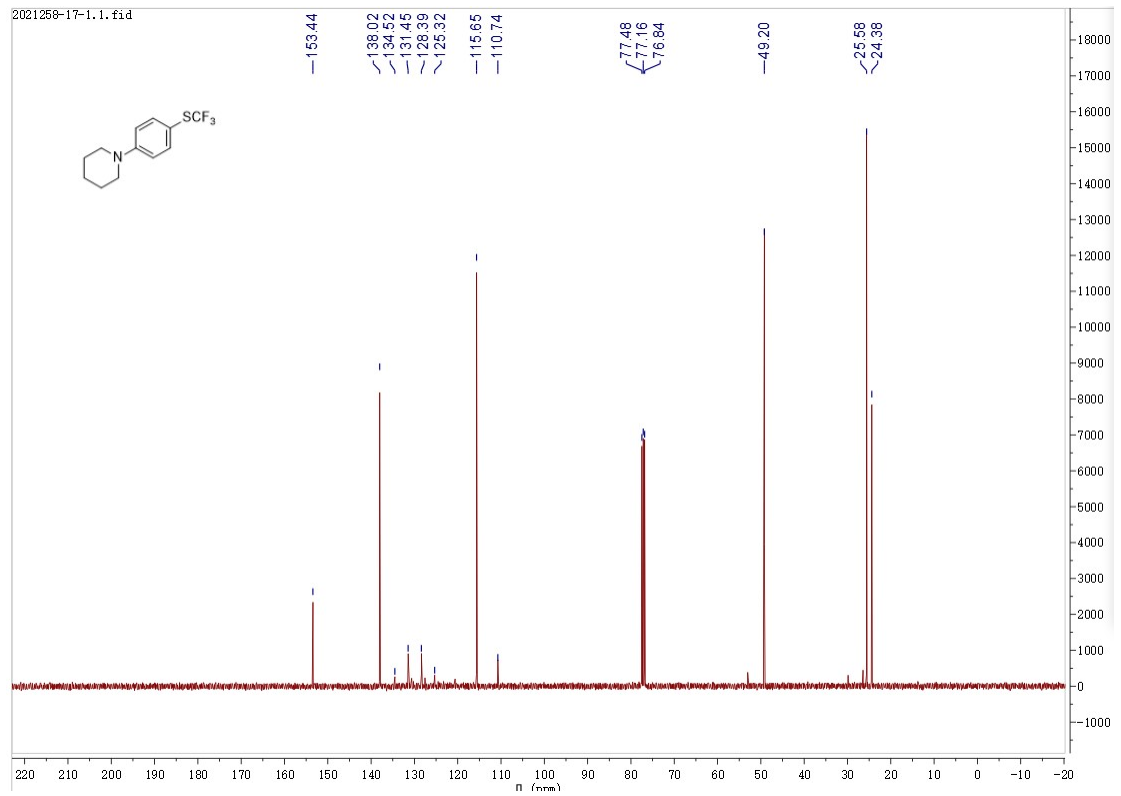

2021238-63-13\_PROTON\_01  
2021238-63-13

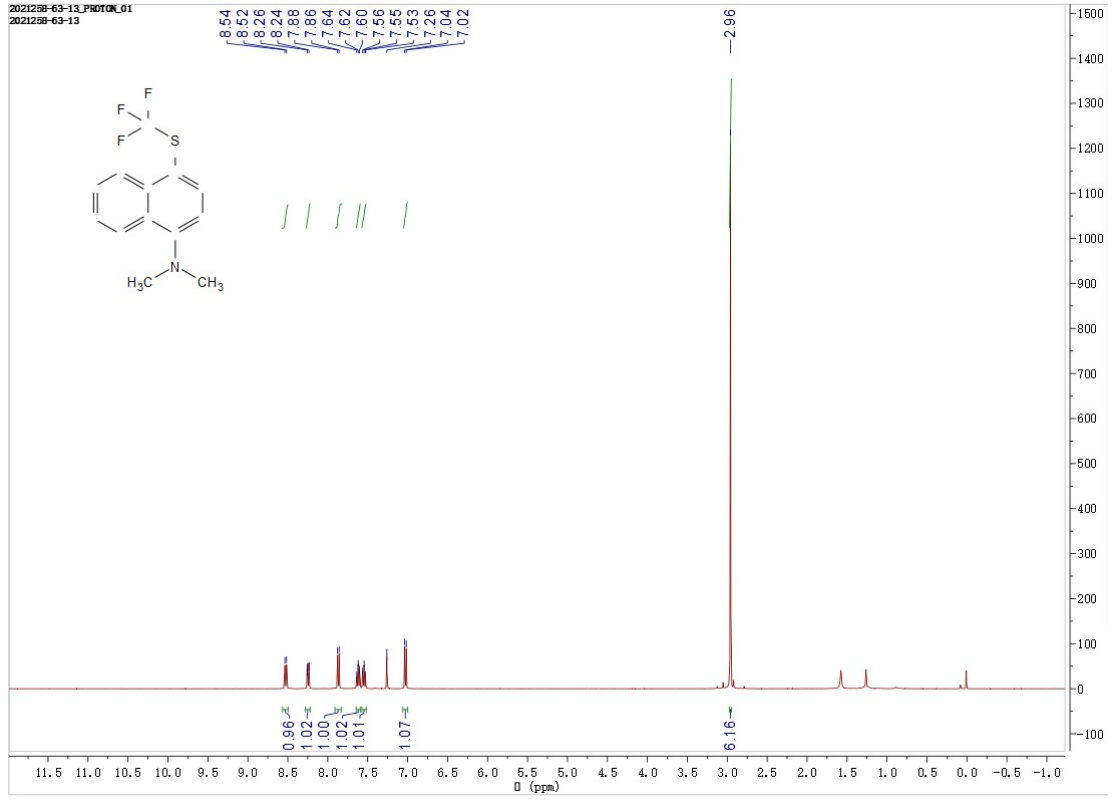

2021238-63-13\_FLUORINE\_01  
2021238-63-13

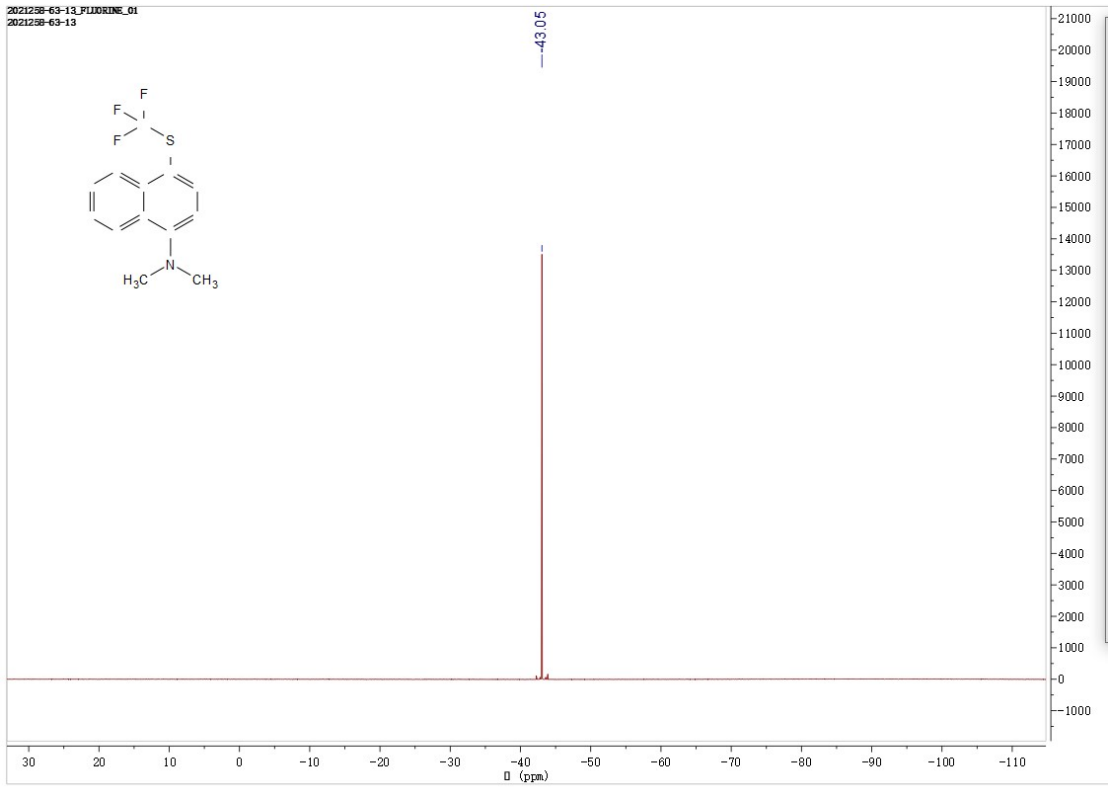

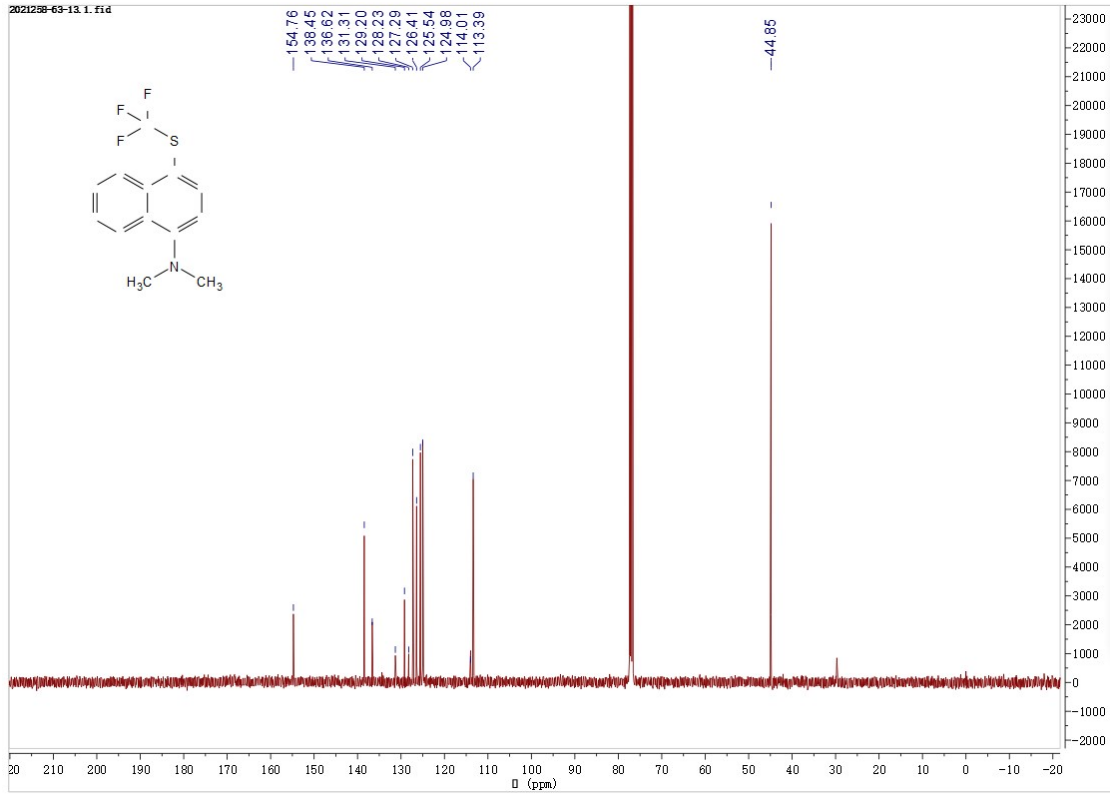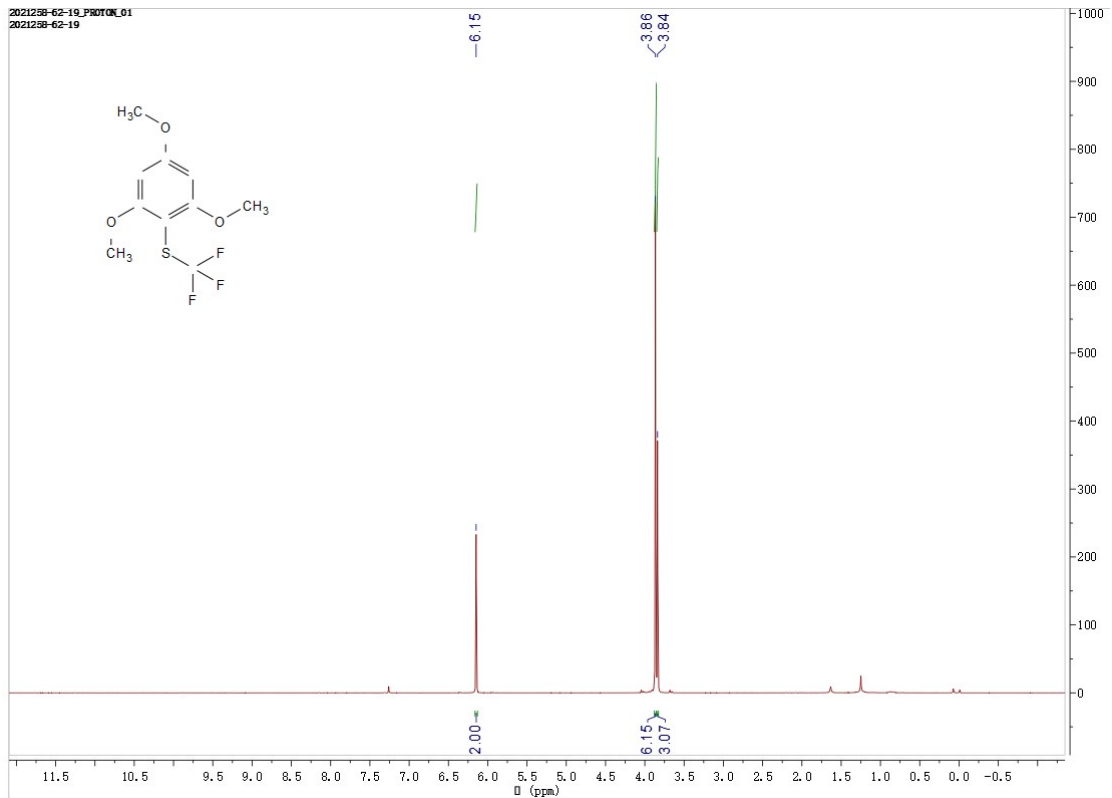

2021238-62-19\_FLUORINE\_01  
2021238-62-19

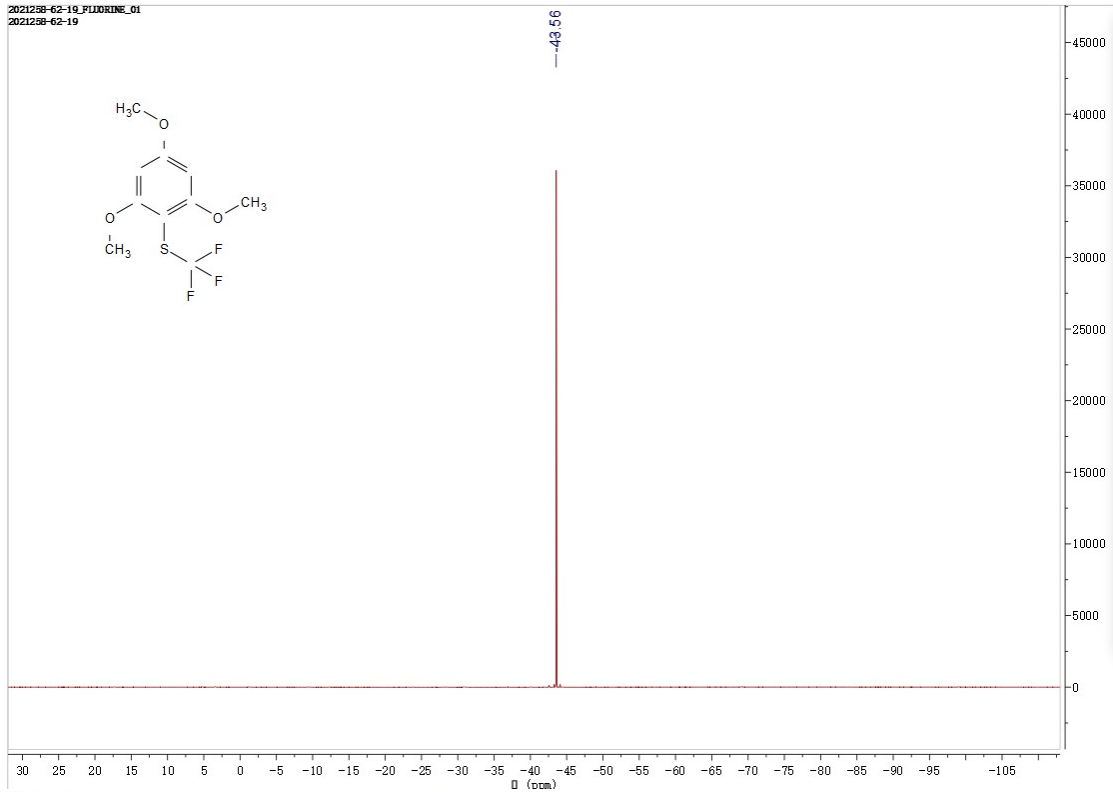

2021238-69-14\_PROTON\_01  
2021238-69-14

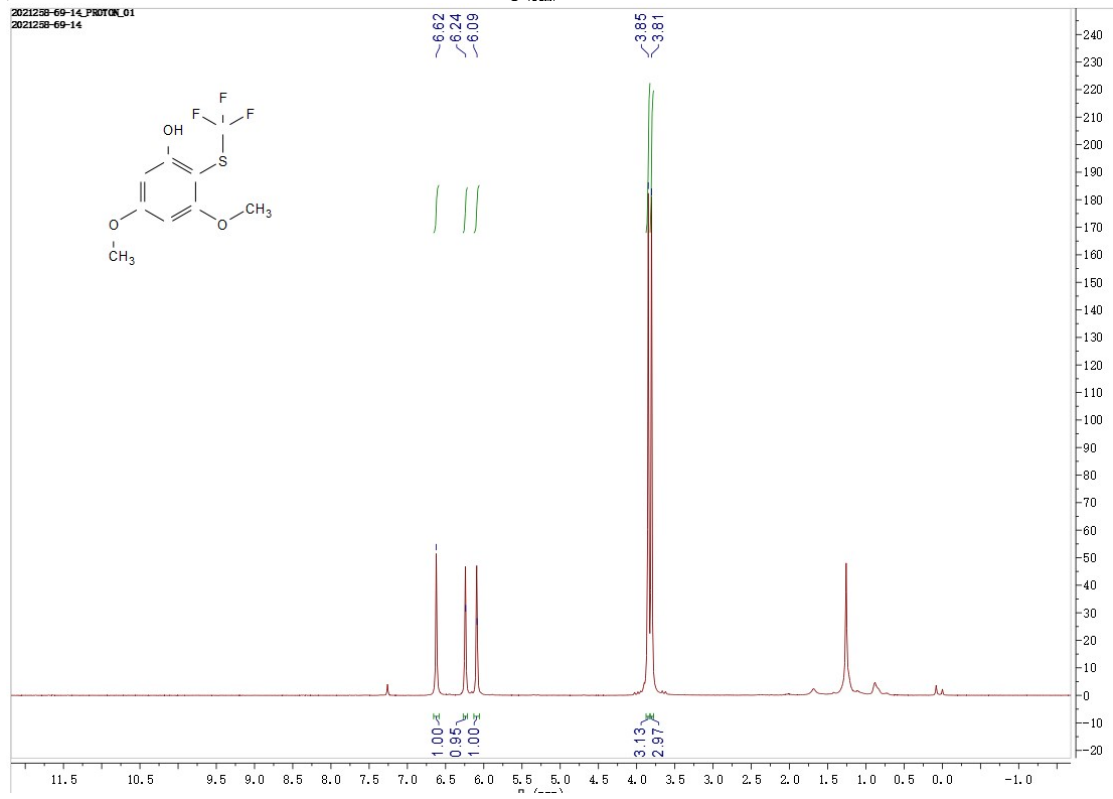

2021238-69-14\_FLUORINE\_01  
2021238-69-14

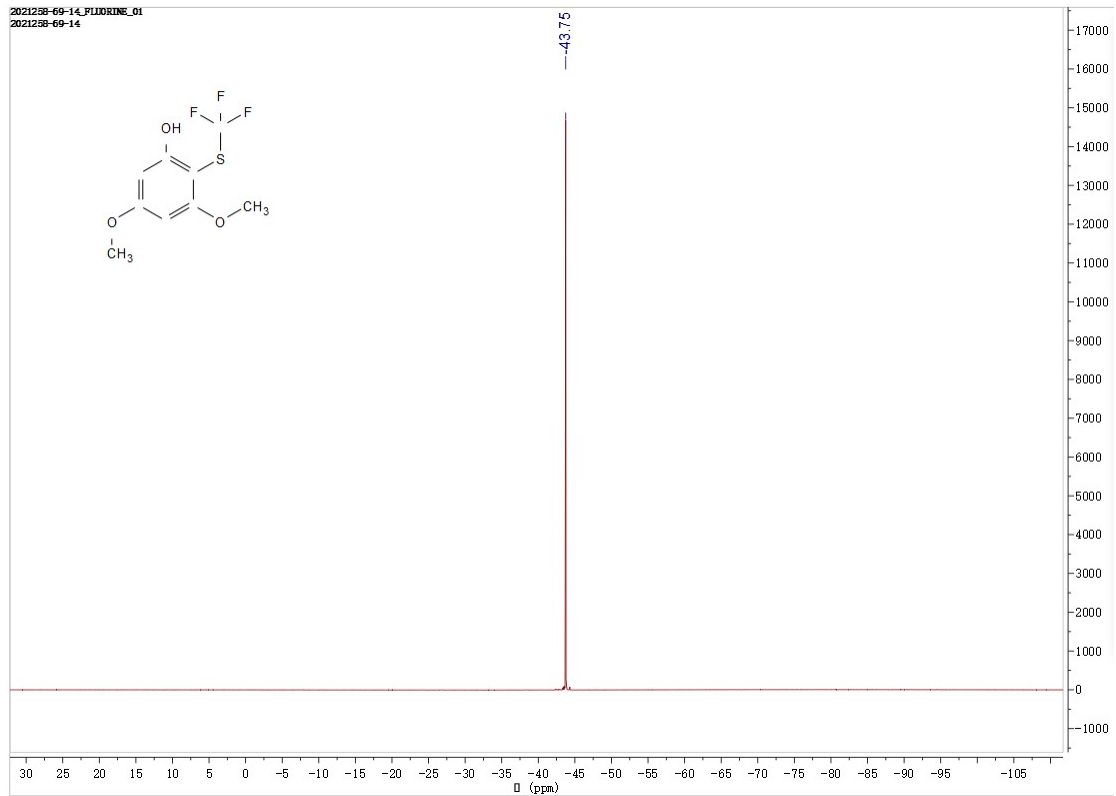

2021238-52-5\_PROTON\_01  
2021238-52-5

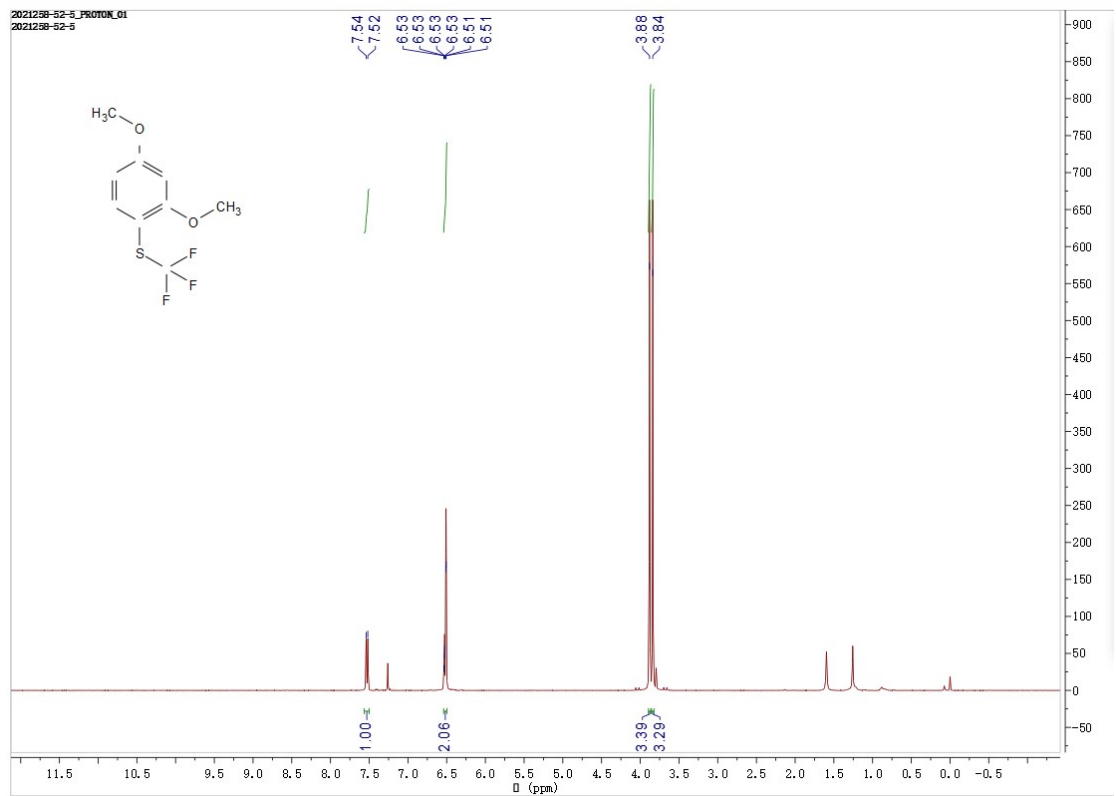

2021288-52-5\_FLUORINE\_01  
2021288-52-5

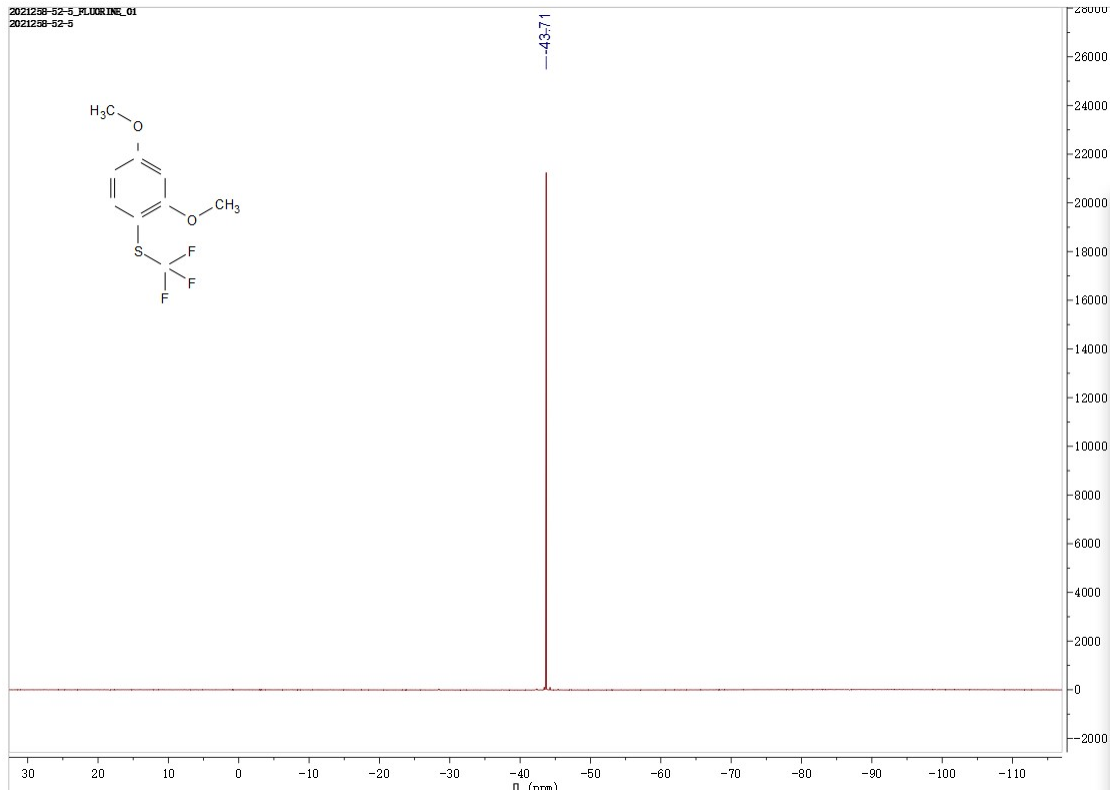

2023929-4\_15-HP\_PROTOCOL\_01  
2023929-4\_15-HP

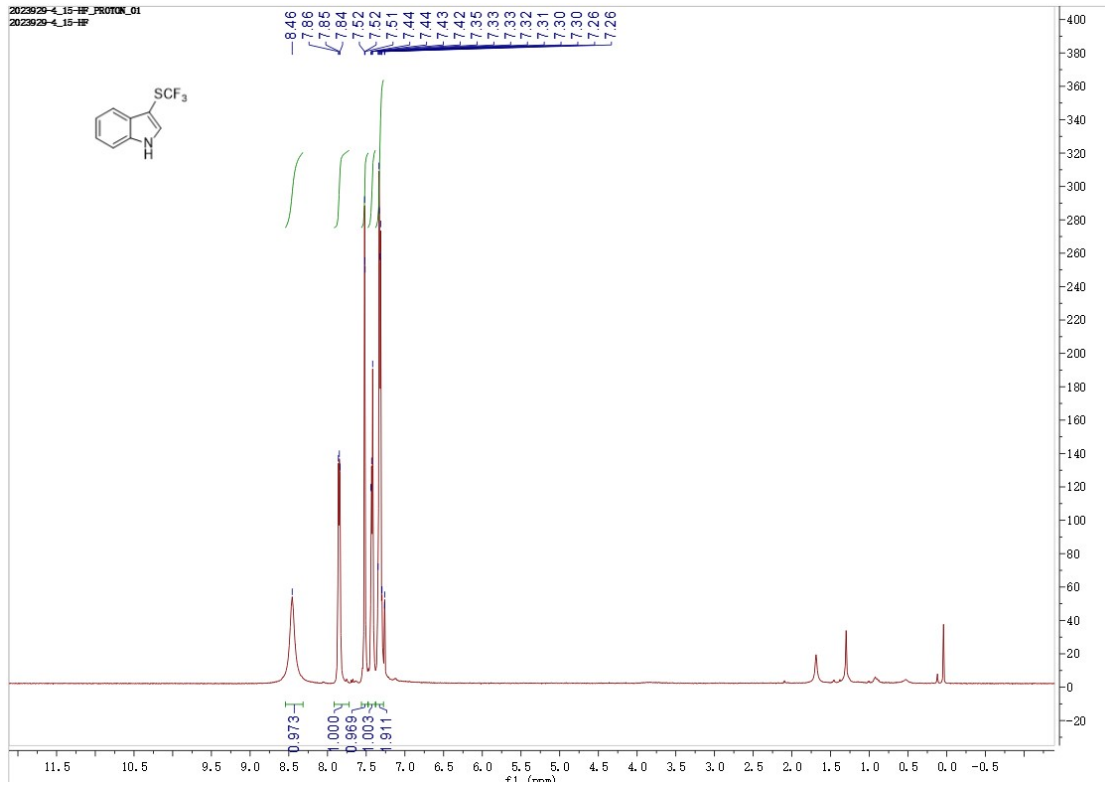

2023929-4\_15-<sup>19</sup>F\_FLUORINE\_01  
2023929-4\_15-<sup>19</sup>F

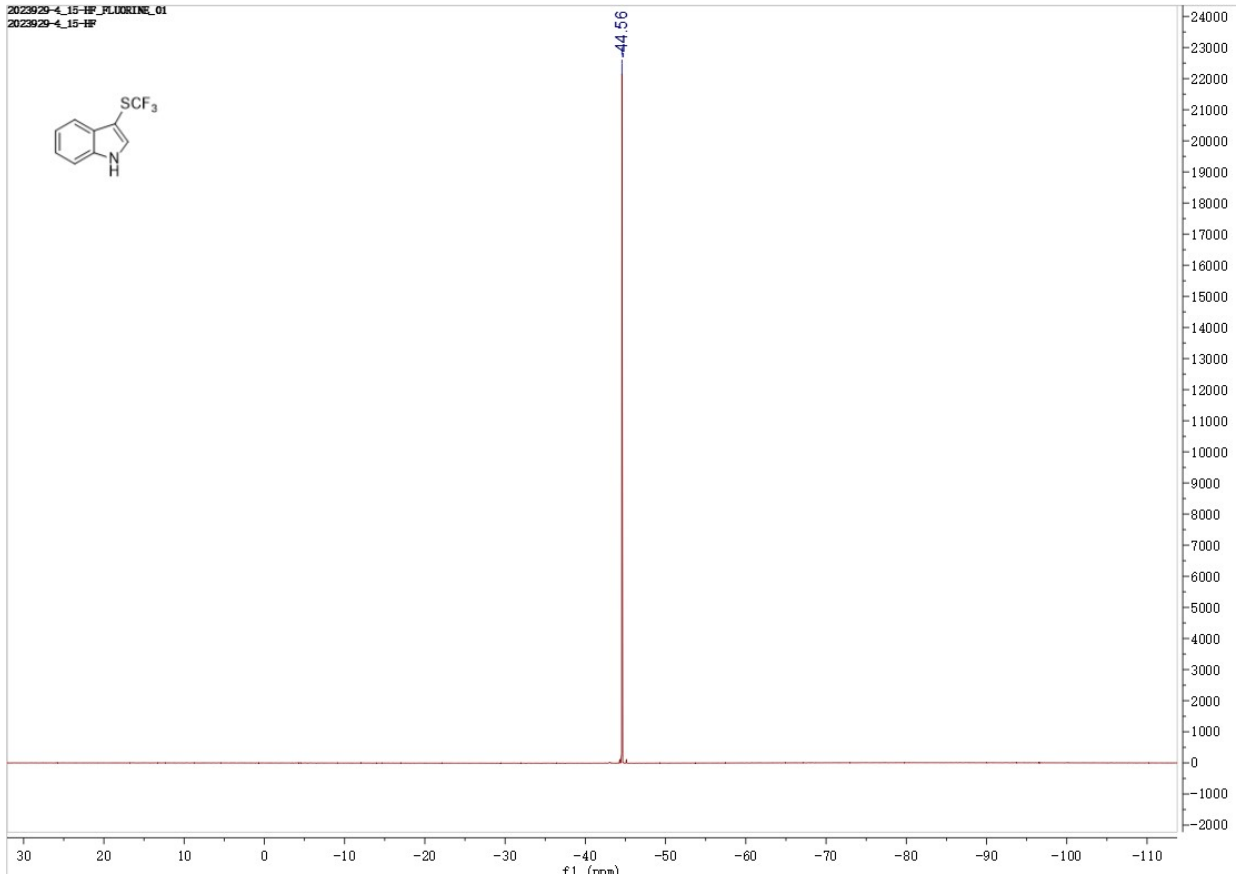

2021288-99-7\_PROTON\_01  
2021288-99-7

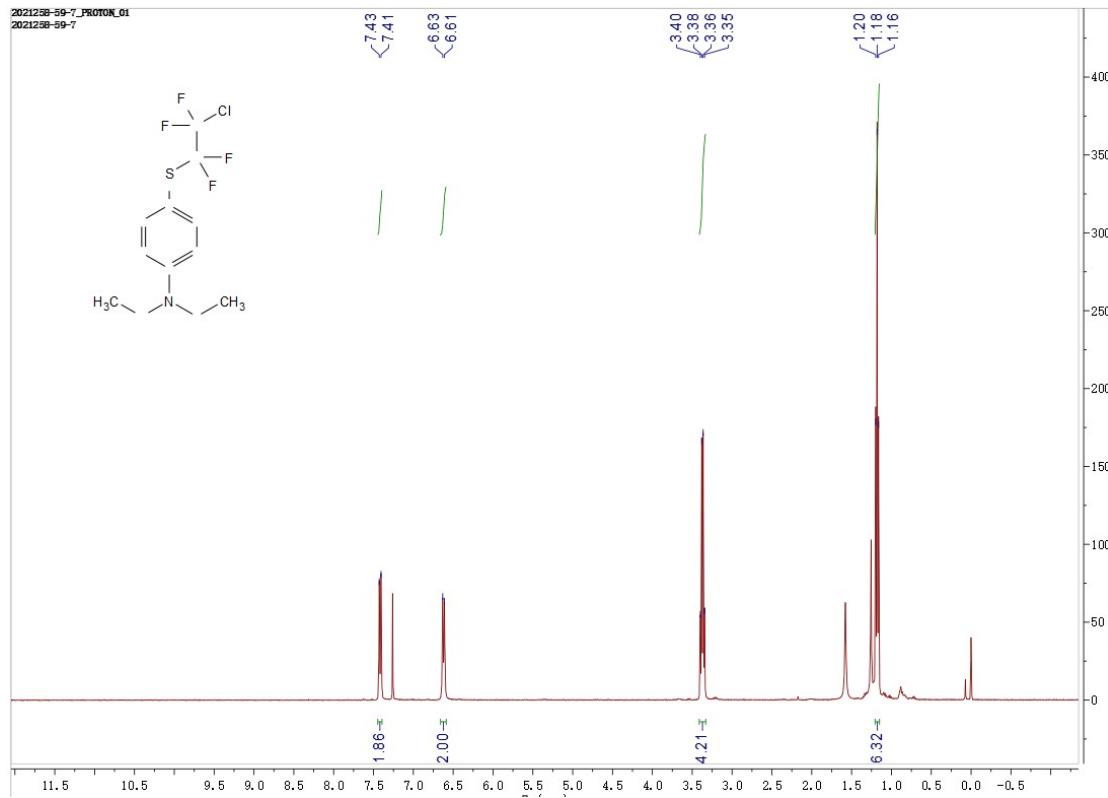

2021238-59-7\_FLOURINE\_01  
2021238-59-7

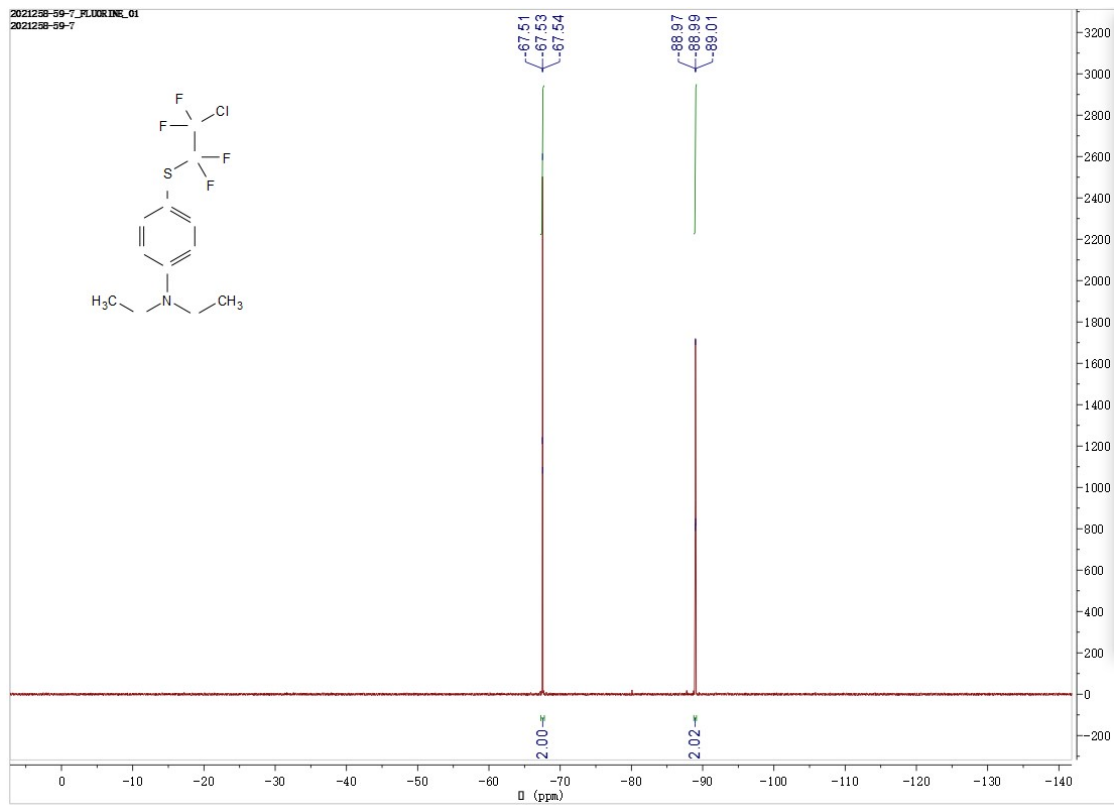

2021238-82-15.1.fid

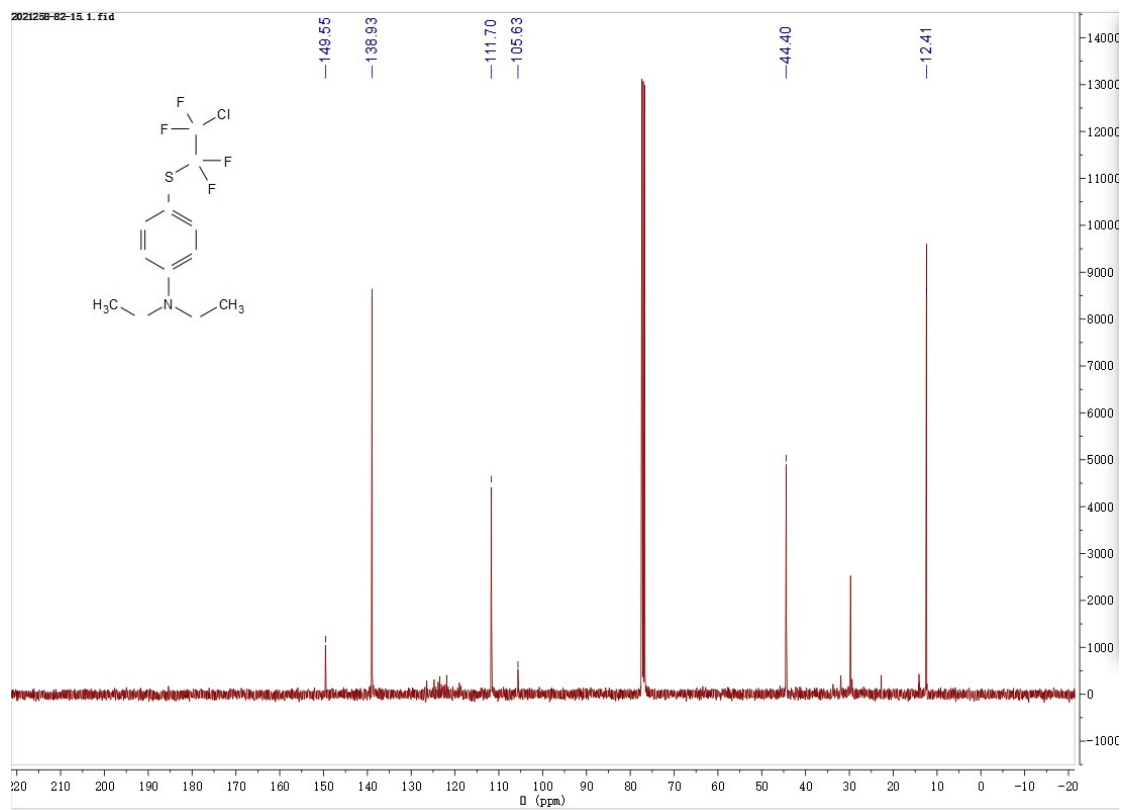

2021238-60-4\_PROTON\_01  
2021238-60-4

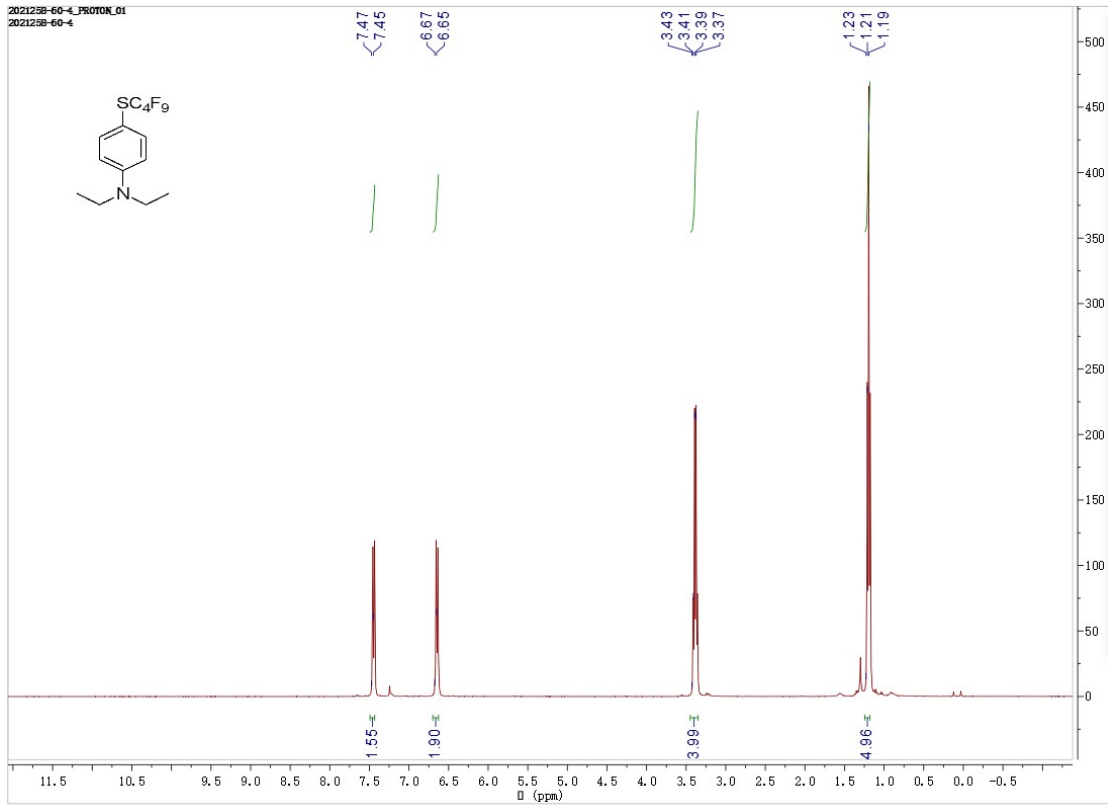

2021238-60-4\_FLUORINE\_01  
2021238-60-4

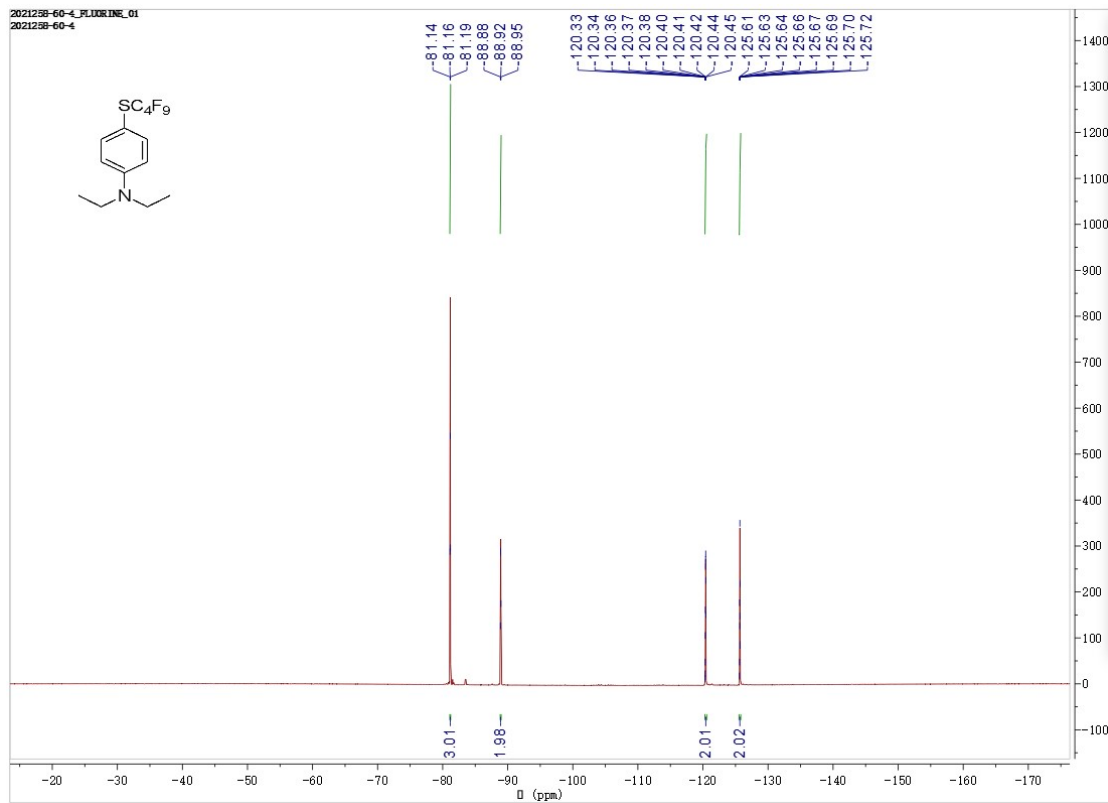

2021258-60-4. 1.fid

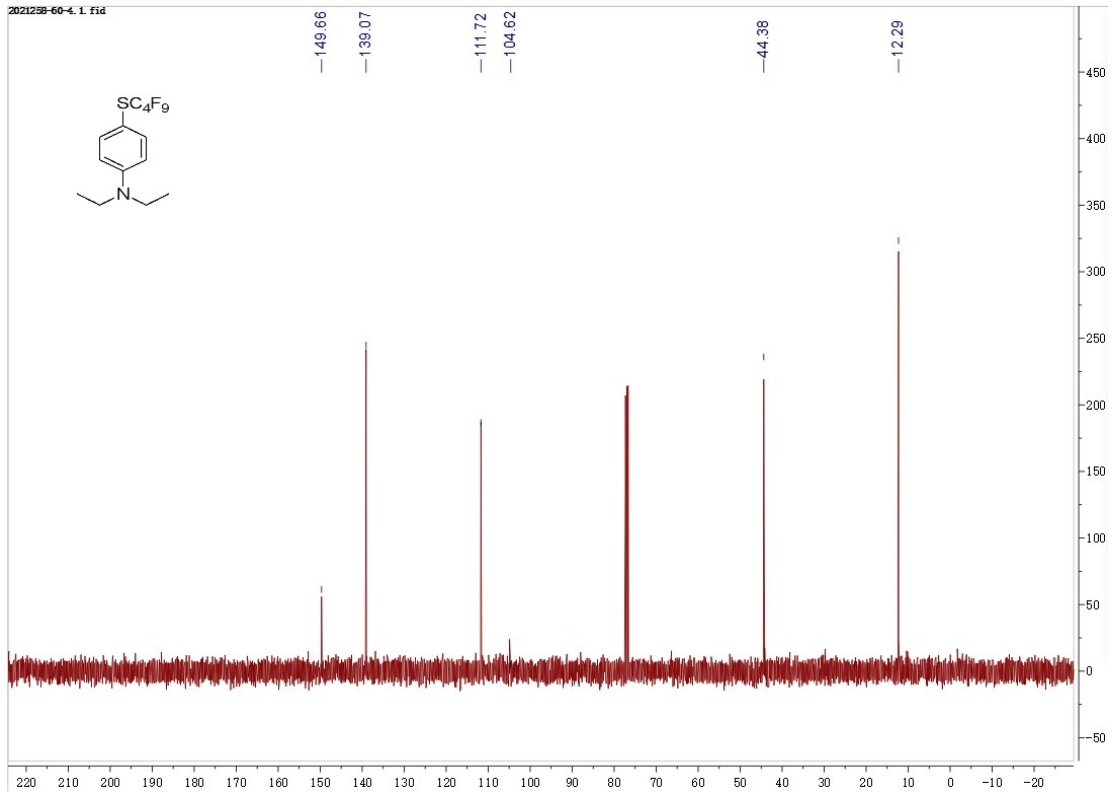

2021258-61-4\_PROTON\_01  
2021258-61-4

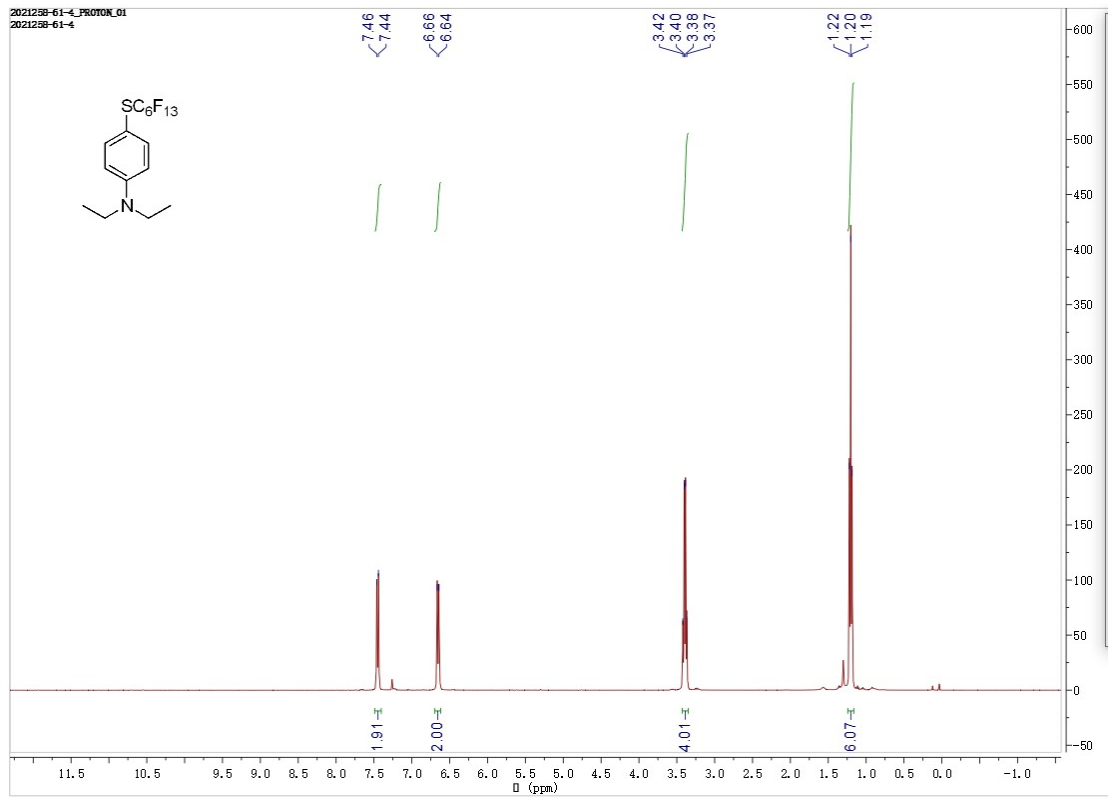

2021238-61-4\_FLUORINE\_01  
2021238-61-4

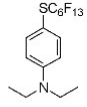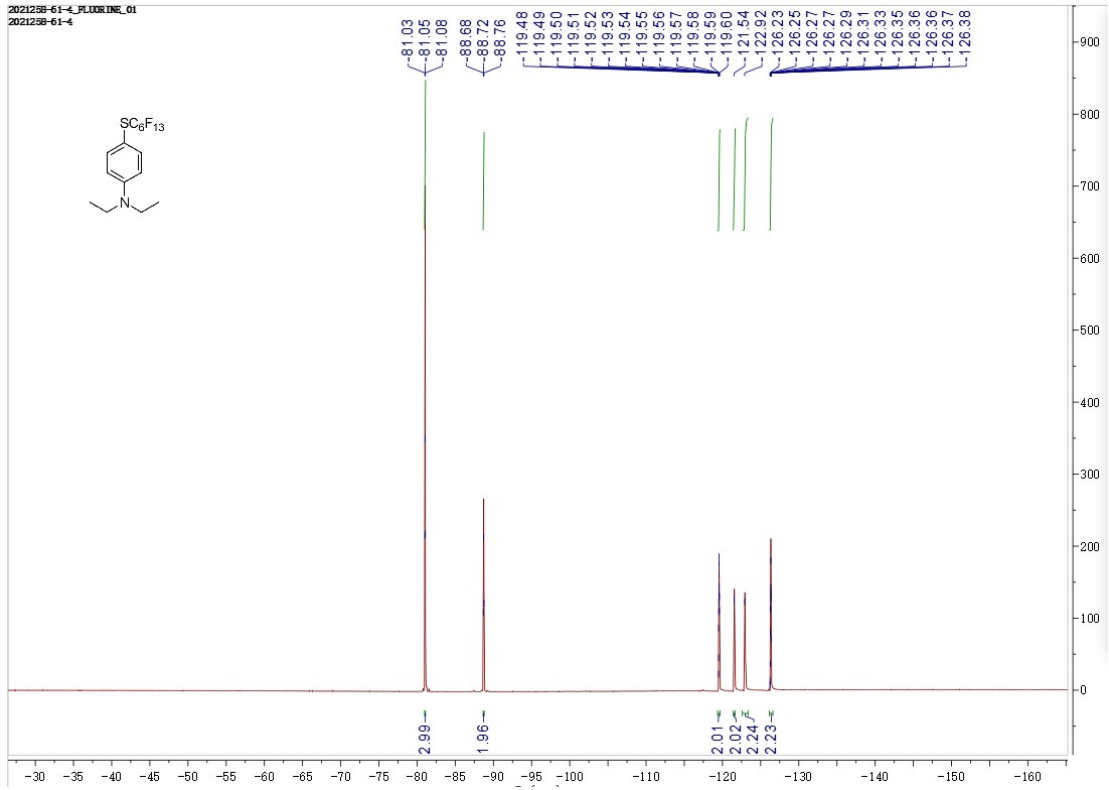

2021238-61-4\_1.fid

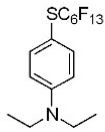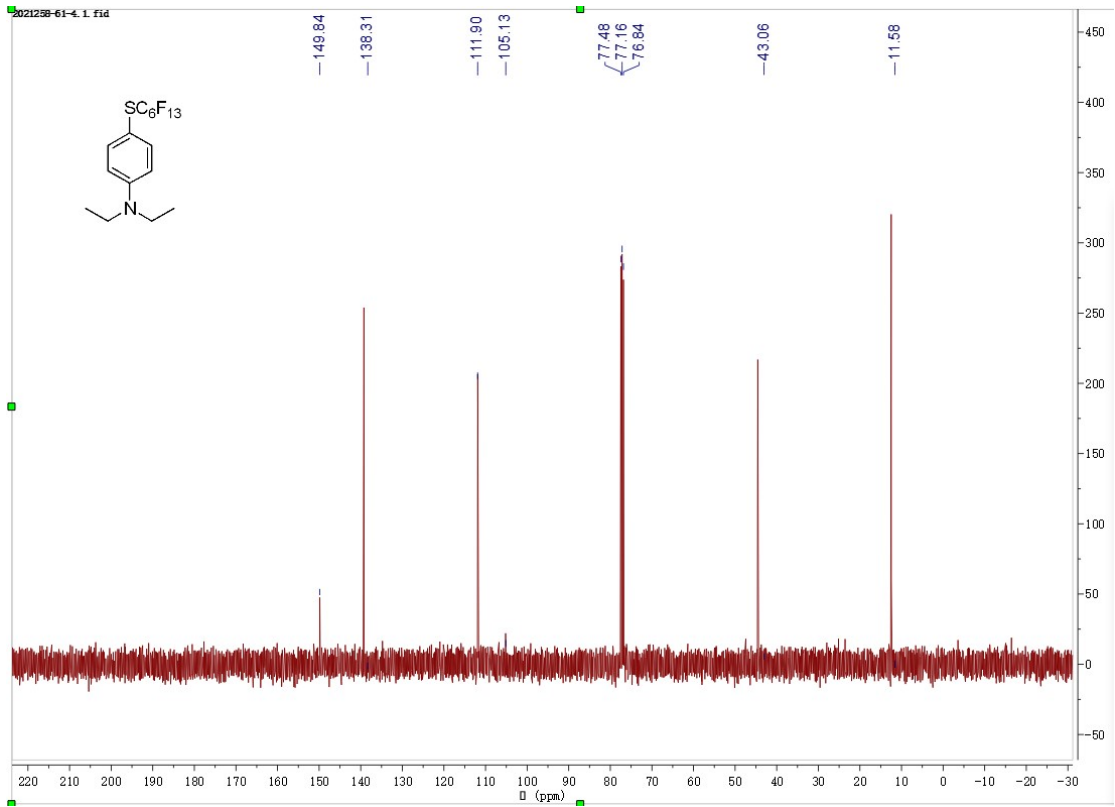

2021298-81-14\_PROTON\_01  
2021298-81-14

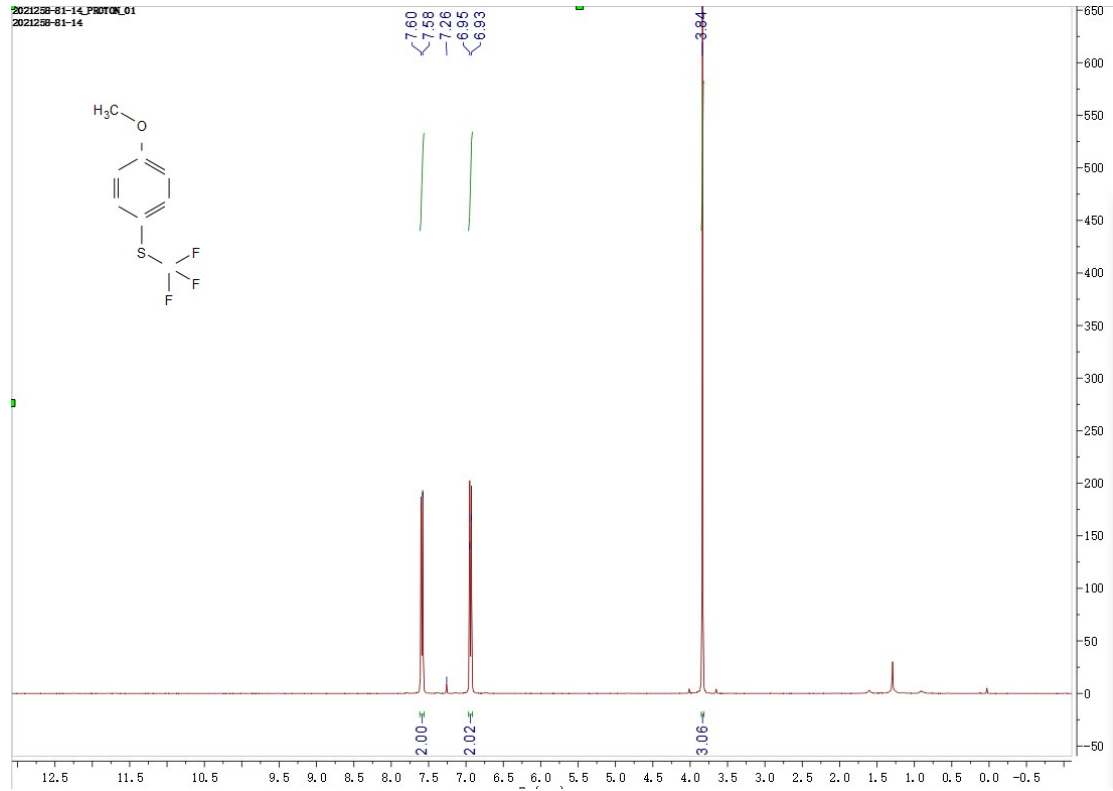

2021298-81-14\_FLUORINE\_01  
2021298-81-14

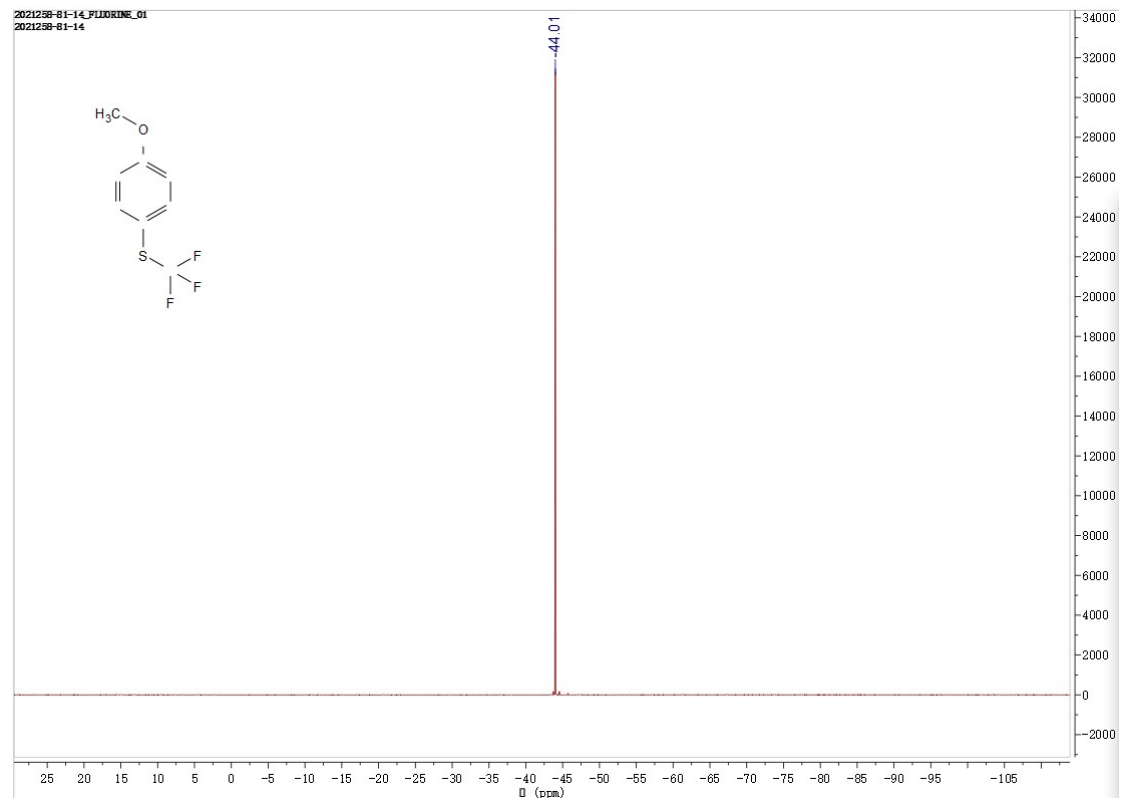

2021258-33-12\_PROTON\_01  
2021258-33-12

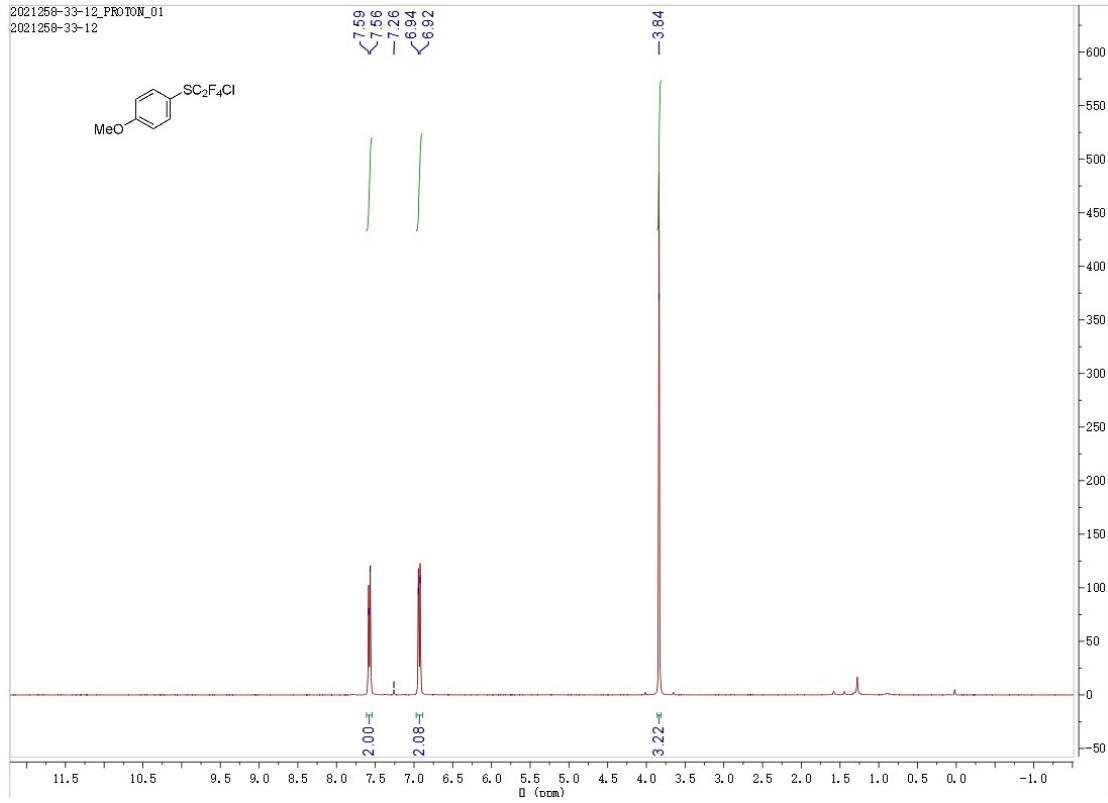

2021258-33-12\_FLUORINE\_01  
2021258-33-12

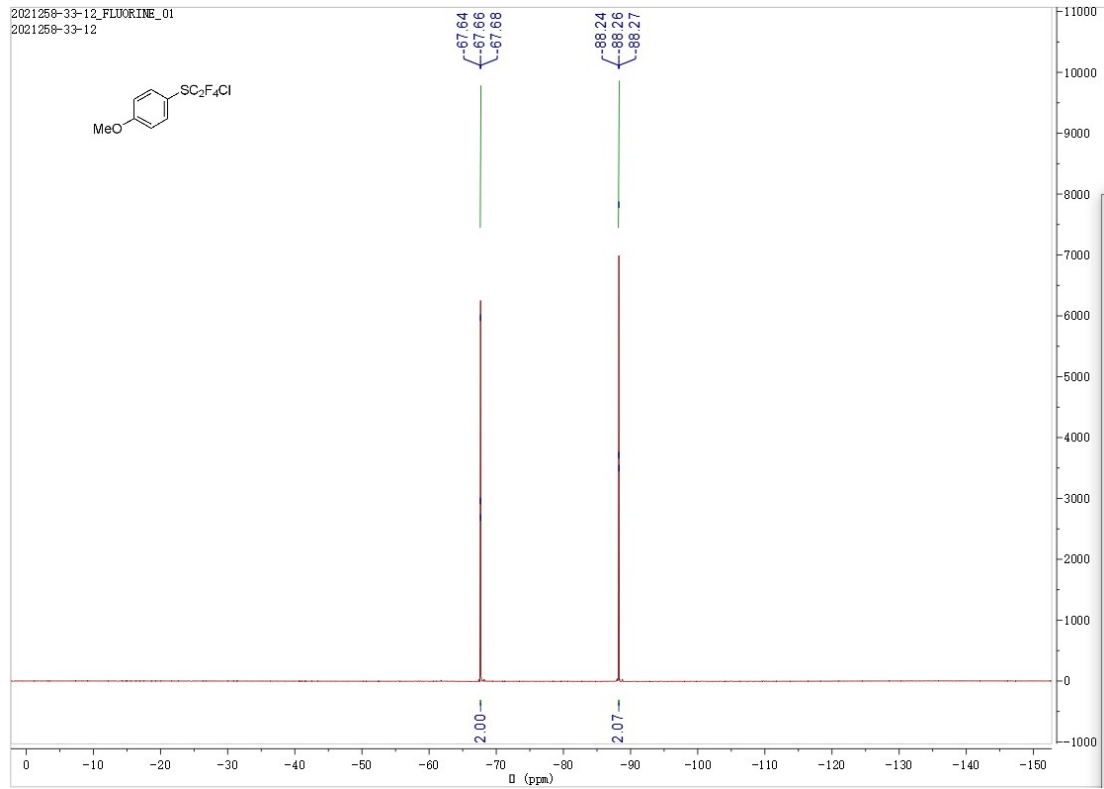

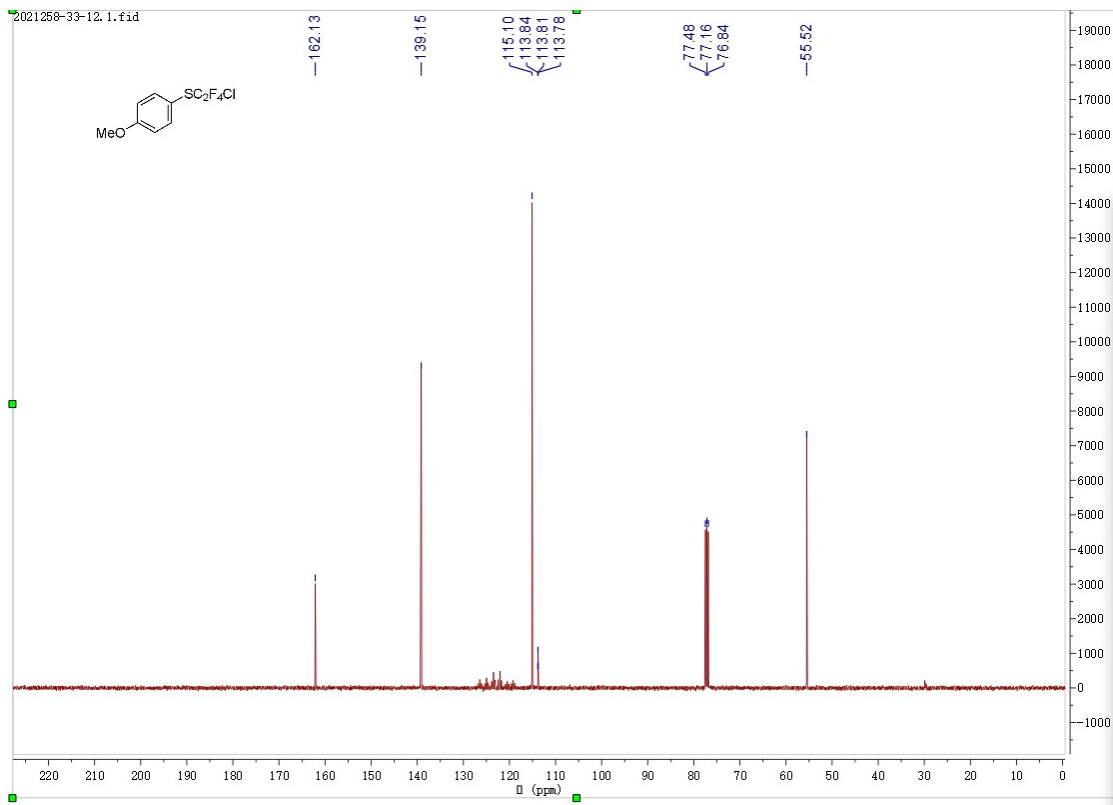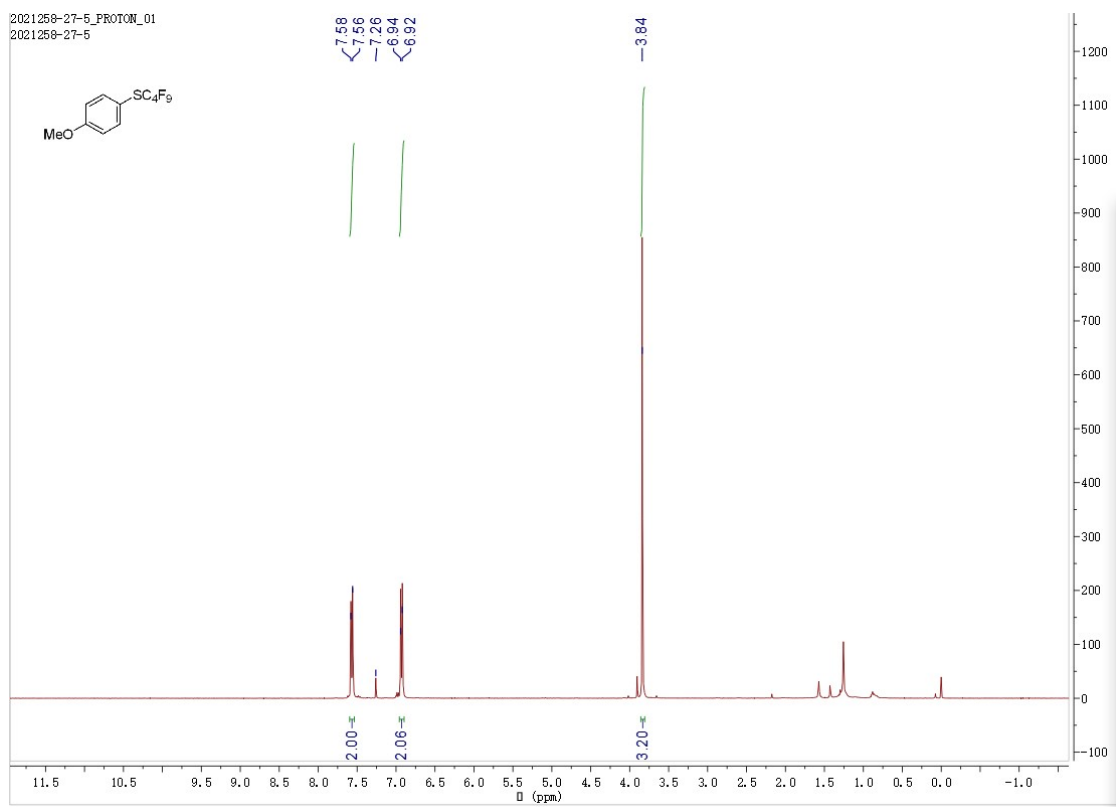

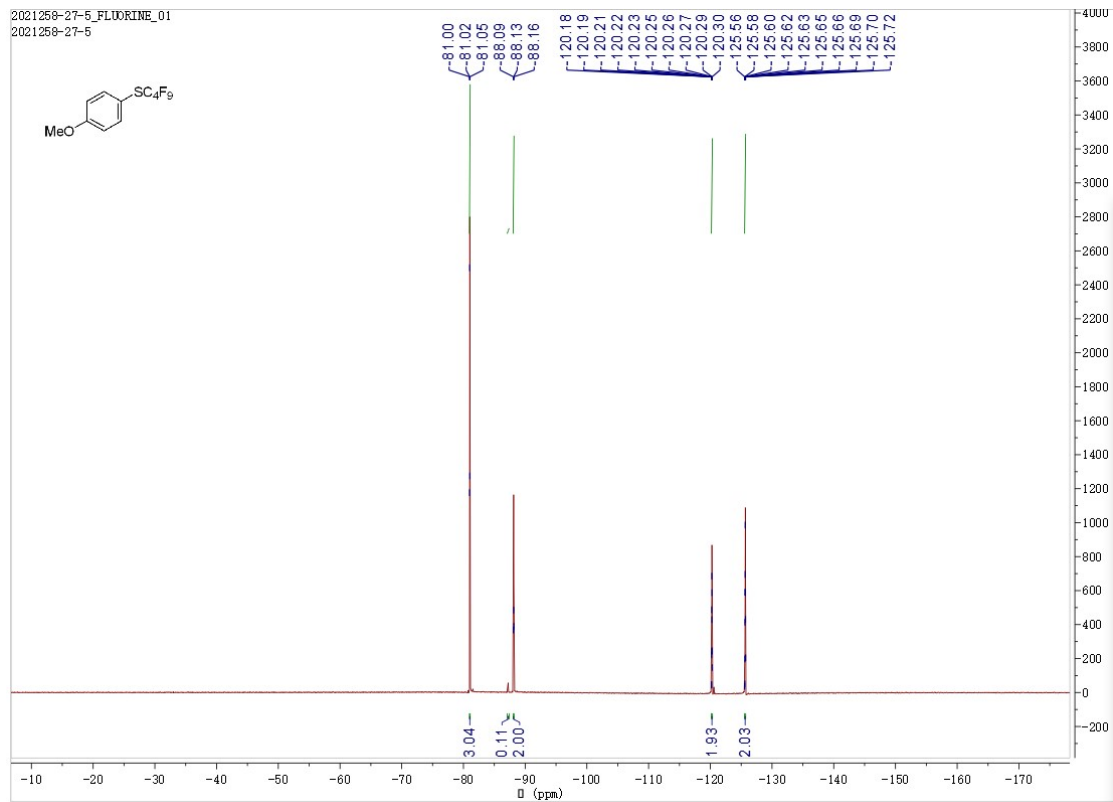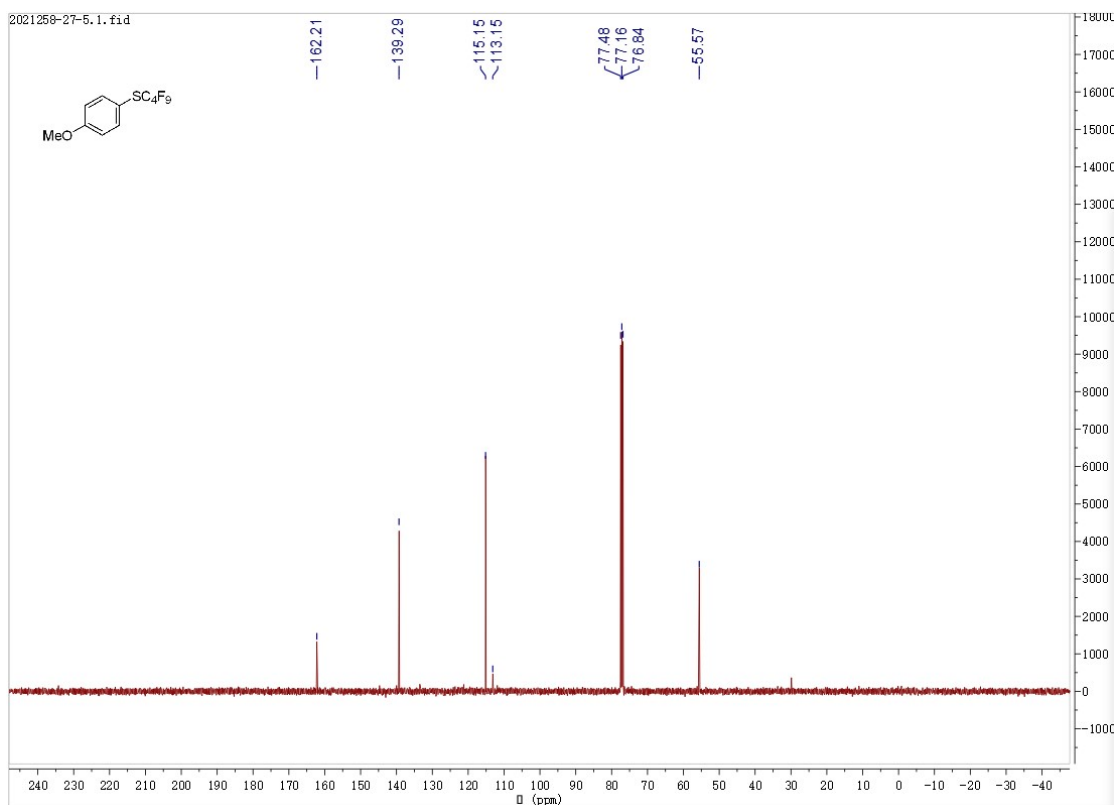

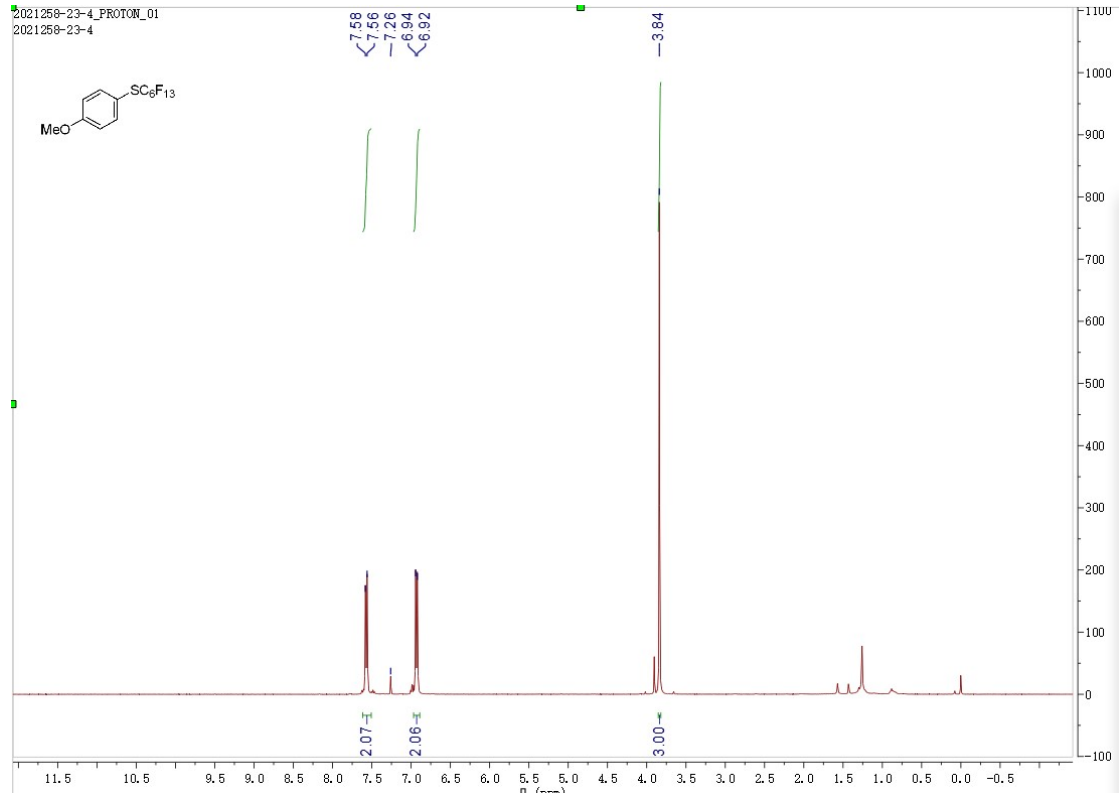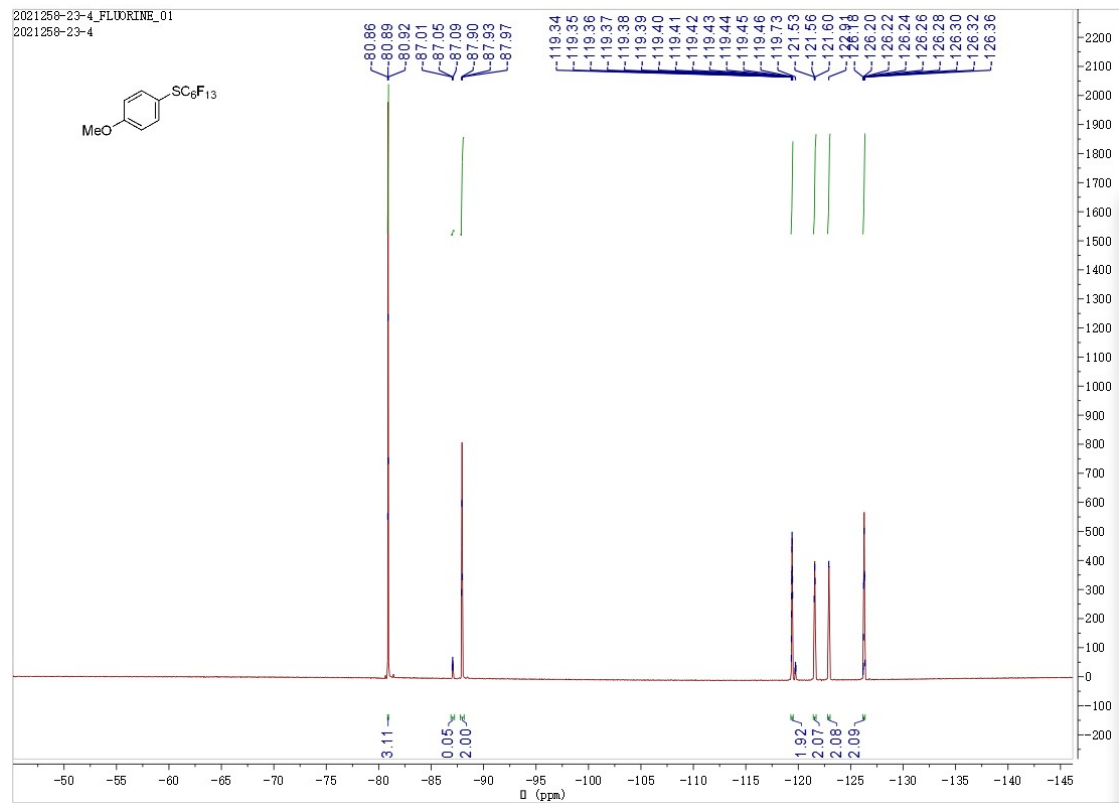

2021258-23-4.1.fid

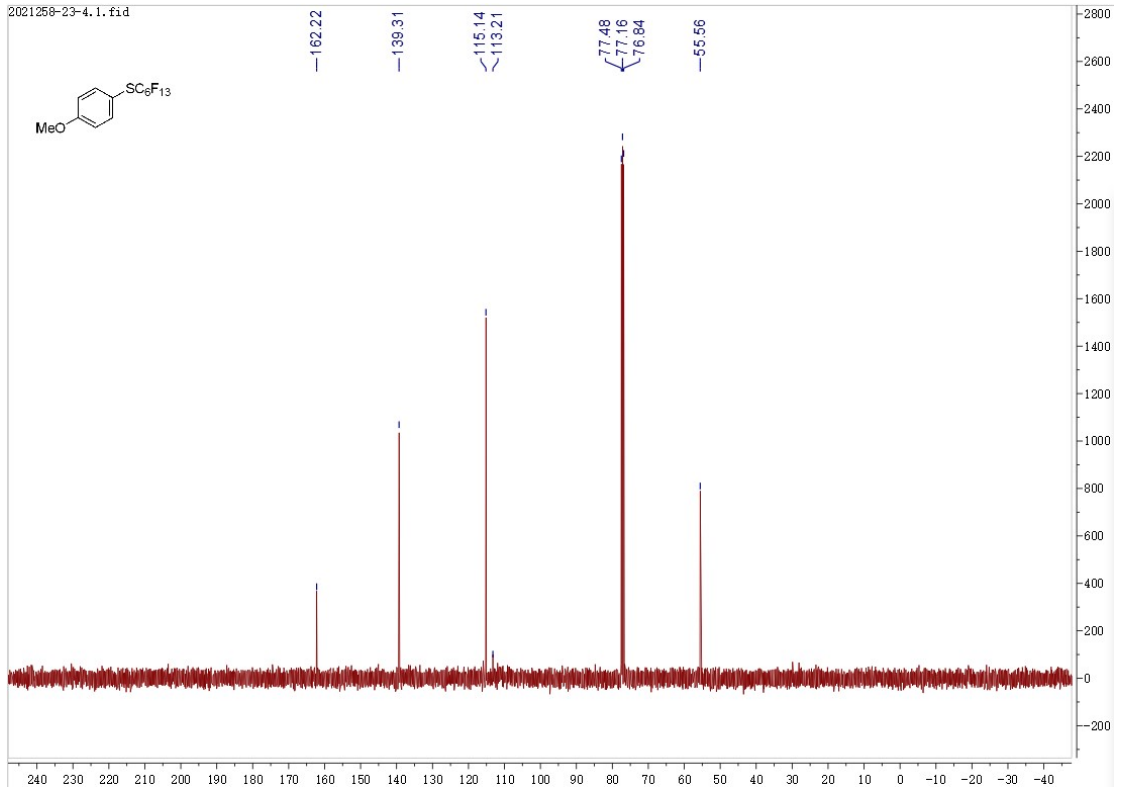

2021258-36-8\_PROTON\_01  
2021258-36-8

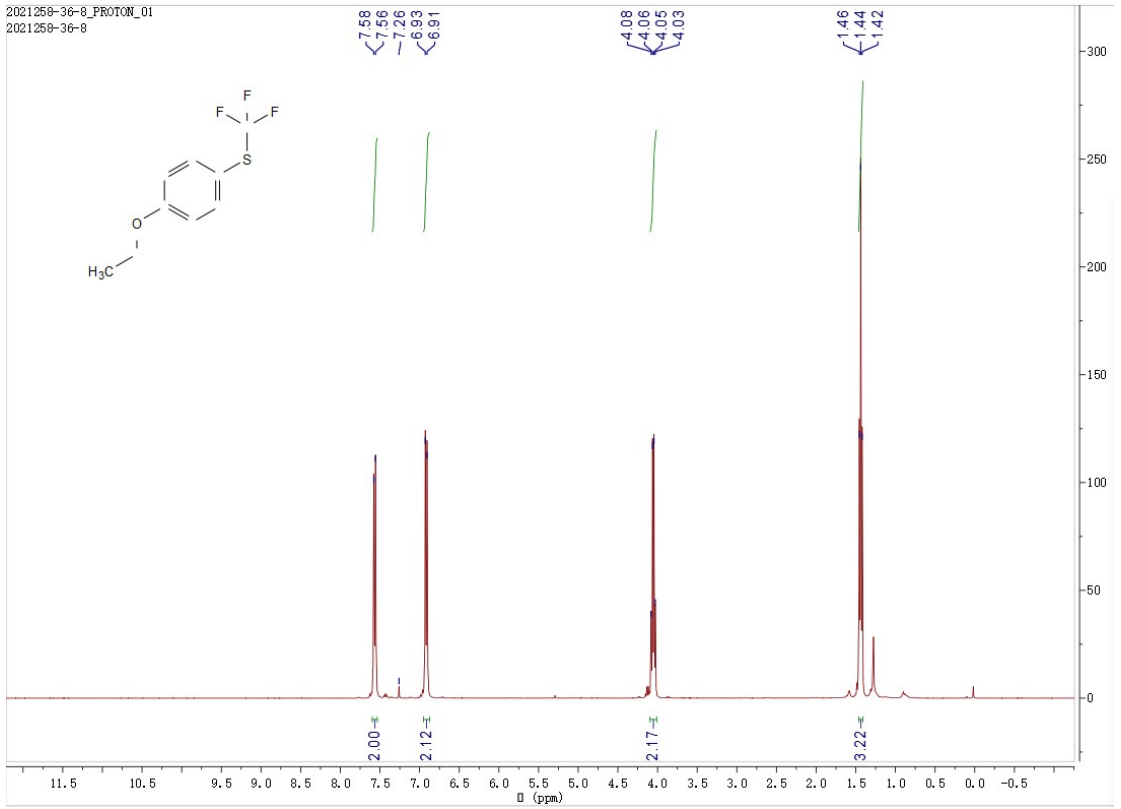

2021259-36-8\_FLUORINE\_01  
2021259-36-8

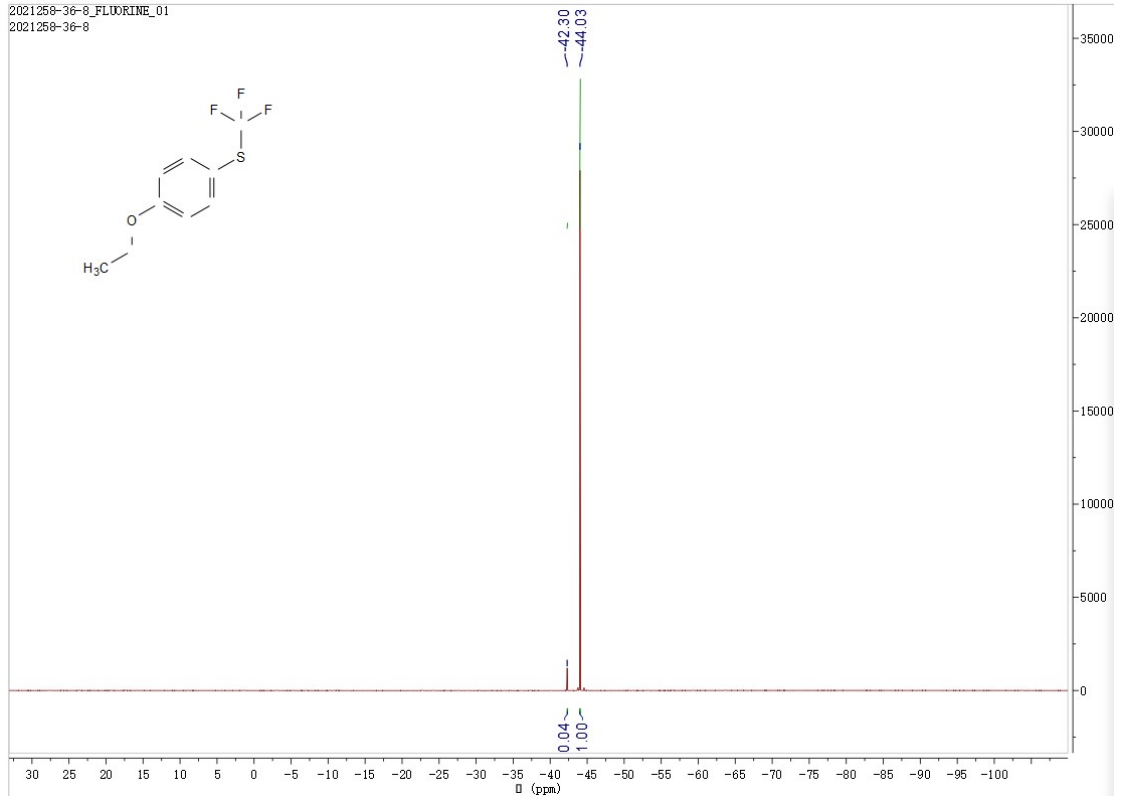

2021259-38-1\_PROTON\_01  
2021259-38-1

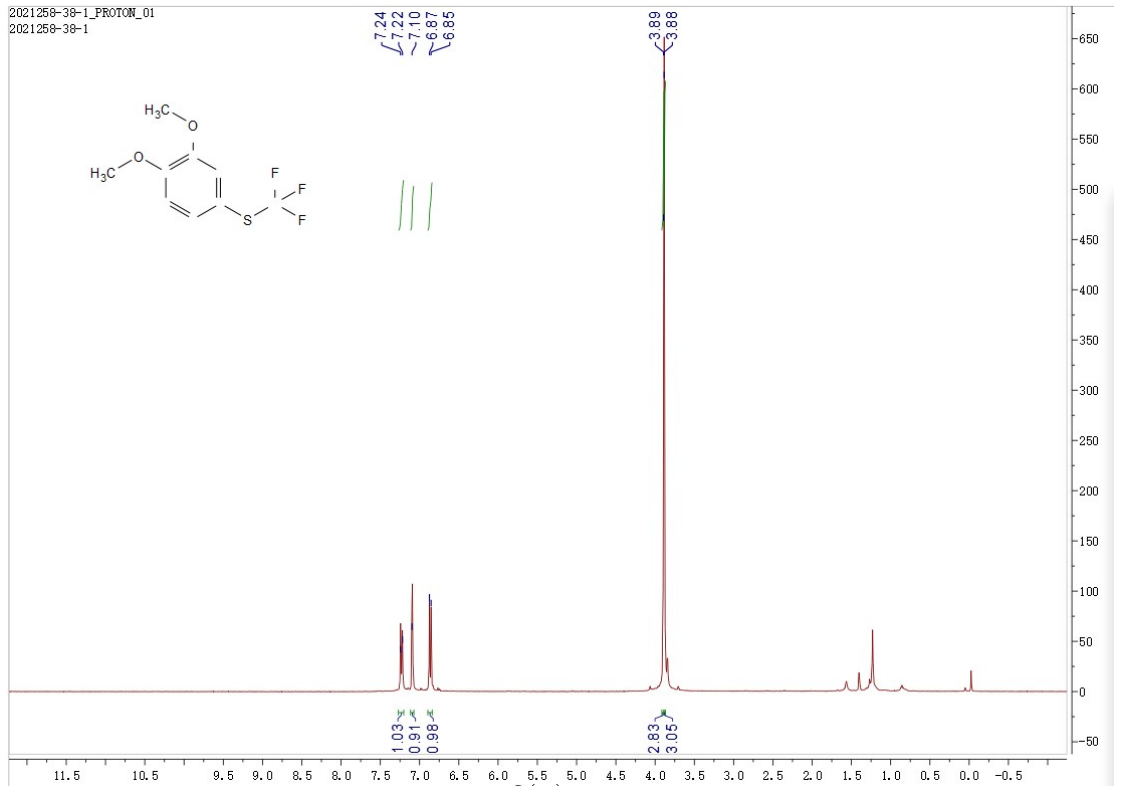

2021259-38-1\_FLUORINE\_01  
2021259-38-1

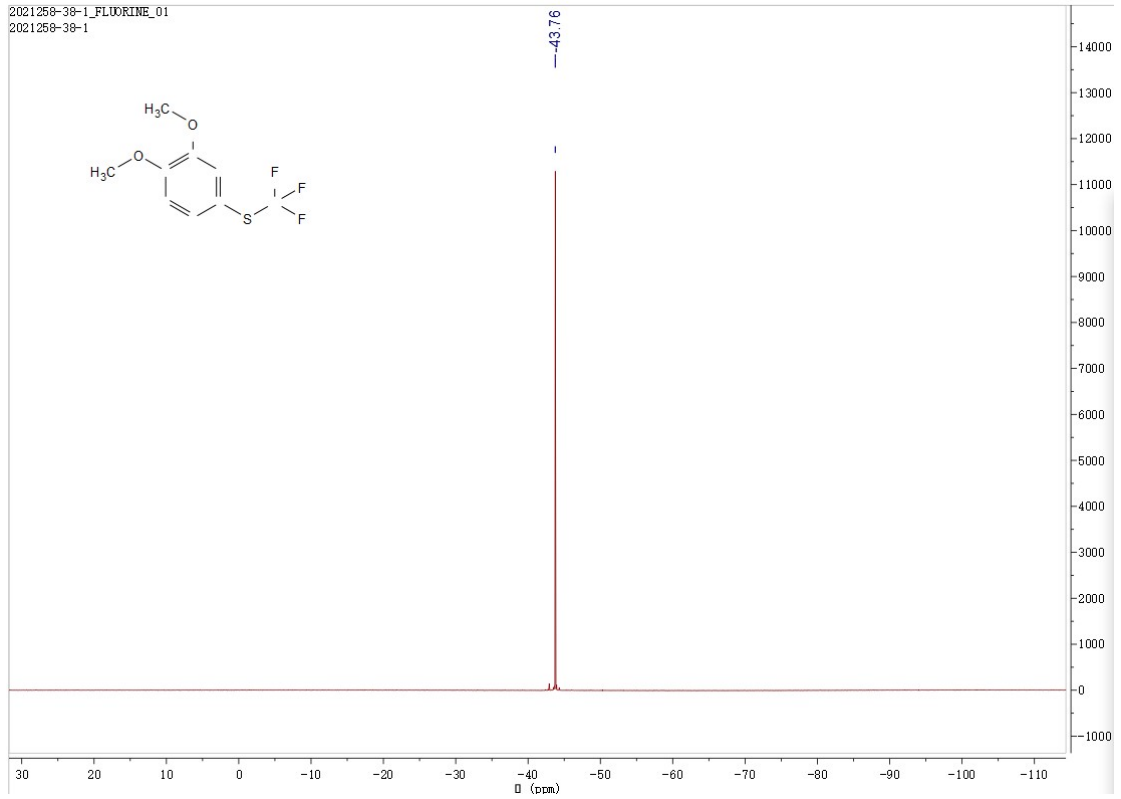

2021259-57-17\_PROTON\_01  
2021259-57-17

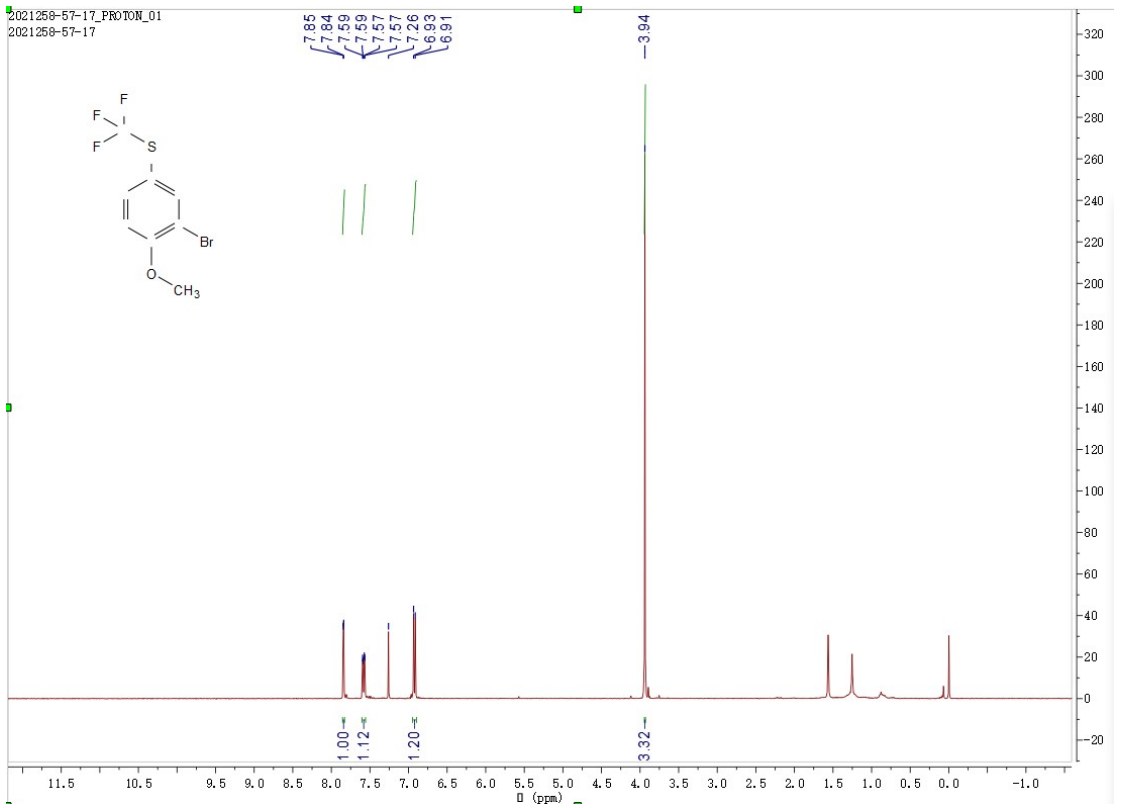

2021258-57-19\_FLUORINE\_01  
2021258-57-19

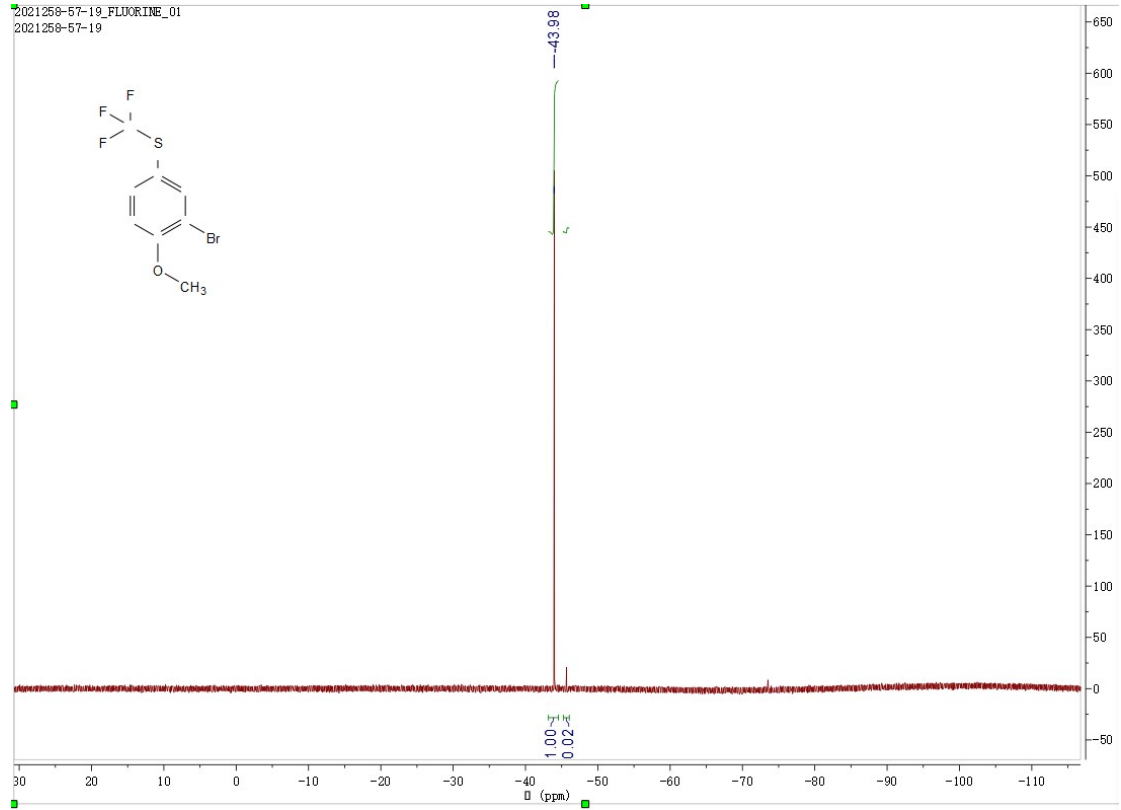

Supplement: d6ob00095a1.pdf [file d6ob00095a1.pdf]
